# Supplementary material for: ‘You have got a foreign body in there’: renal transplantation, unexpected mild-to-moderate distress and patients’ support needs: a qualitative study
Source: PubMed Central journal article supplement (PMC7170619; doi:10.1136/bmjopen-2019-035627), 2020-03-31
Supplement: bmjopen-2019-035627.draft_revisions.pdf [file bmjopen-2019-035627.draft_revisions.pdf]

# BMJ Open

BMJ Open is committed to open peer review. As part of this commitment we make the peer review history of every article we publish publicly available.

When an article is published we post the peer reviewers' comments and the authors' responses online. We also post the versions of the paper that were used during peer review. These are the versions that the peer review comments apply to.

The versions of the paper that follow are the versions that were submitted during the peer review process. They are not the versions of record or the final published versions. They should not be cited or distributed as the published version of this manuscript.

BMJ Open is an open access journal and the full, final, typeset and author-corrected version of record of the manuscript is available on our site with no access controls, subscription charges or pay-per-view fees (<http://bmjopen.bmj.com>).

If you have any questions on BMJ Open's open peer review process please email [info.bmjopen@bmj.com](mailto:info.bmjopen@bmj.com)

# BMJ Open

## **“You’ve got a foreign body in there”: Renal transplantation, unexpected distress and patients’ support needs: a qualitative study**

|                               |                                                                                                                                                                                                                                                                                                                                                                                                                                                                                  |
|-------------------------------|----------------------------------------------------------------------------------------------------------------------------------------------------------------------------------------------------------------------------------------------------------------------------------------------------------------------------------------------------------------------------------------------------------------------------------------------------------------------------------|
| Journal:                      | <i>BMJ Open</i>                                                                                                                                                                                                                                                                                                                                                                                                                                                                  |
| Manuscript ID                 | bmjopen-2019-035627                                                                                                                                                                                                                                                                                                                                                                                                                                                              |
| Article Type:                 | Original research                                                                                                                                                                                                                                                                                                                                                                                                                                                                |
| Date Submitted by the Author: | 08-Nov-2019                                                                                                                                                                                                                                                                                                                                                                                                                                                                      |
| Complete List of Authors:     | Jones, Janet ; University of Birmingham, Institute of Applied Health Research<br>Damery, Sarah; University of Birmingham, Institute of Applied Health Research<br>Allen, Kerry; University of Birmingham, Health Services Management Centre<br>Nicholas, Johann; Shrewsbury and Telford Hospital NHS Trust, Renal Unit<br>Baharani, Jyoti; Heart of England NHS Foundation Trust, Renal Medicine<br>Combes, Gill; University of Birmingham, Institute of Applied Health Research |
| Keywords:                     | Renal transplantation < NEPHROLOGY, Anxiety disorders < PSYCHIATRY, QUALITATIVE RESEARCH                                                                                                                                                                                                                                                                                                                                                                                         |
|                               |                                                                                                                                                                                                                                                                                                                                                                                                                                                                                  |

SCHOLARONE™  
Manuscripts

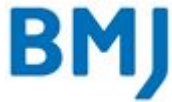

I, the Submitting Author has the right to grant and does grant on behalf of all authors of the Work (as defined in the below author licence), an exclusive licence and/or a non-exclusive licence for contributions from authors who are: i) UK Crown employees; ii) where BMJ has agreed a CC-BY licence shall apply, and/or iii) in accordance with the terms applicable for US Federal Government officers or employees acting as part of their official duties; on a worldwide, perpetual, irrevocable, royalty-free basis to BMJ Publishing Group Ltd ("BMJ") its licensees and where the relevant Journal is co-owned by BMJ to the co-owners of the Journal, to publish the Work in this journal and any other BMJ products and to exploit all rights, as set out in our [licence](#).

The Submitting Author accepts and understands that any supply made under these terms is made by BMJ to the Submitting Author unless you are acting as an employee on behalf of your employer or a postgraduate student of an affiliated institution which is paying any applicable article publishing charge ("APC") for Open Access articles. Where the Submitting Author wishes to make the Work available on an Open Access basis (and intends to pay the relevant APC), the terms of reuse of such Open Access shall be governed by a Creative Commons licence – details of these licences and which [Creative Commons](#) licence will apply to this Work are set out in our licence referred to above.

Other than as permitted in any relevant BMJ Author's Self Archiving Policies, I confirm this Work has not been accepted for publication elsewhere, is not being considered for publication elsewhere and does not duplicate material already published. I confirm all authors consent to publication of this Work and authorise the granting of this licence.

1  
2  
3 **“You’ve got a foreign body in there”**: Renal transplantation, unexpected  
4 **distress and patients’ support needs: a qualitative study**  
5  
6  
7

8 Short title: Unexpected distress in renal transplant patients  
9

10  
11 Janet Jones\*<sup>1</sup>, Sarah Damery<sup>1</sup>, Kerry Allen<sup>2</sup>, Johann Nicholas<sup>3^</sup>, Jyoti Baharani<sup>4</sup>, and  
12  
13 Gill Combes<sup>1</sup>,  
14  
15

16  
17  
18  
19 <sup>1</sup>Institute of Applied Health Research, University of Birmingham, Birmingham UK.  
20

21  
22 <sup>2</sup>Health Services Management Centre, University of Birmingham, Birmingham, UK.  
23

24  
25 <sup>3</sup>Renal Unit, New Cross Hospital, Royal Wolverhampton NHS Trust, Wolverhampton,  
26

27  
28 <sup>4</sup>Renal Unit, Birmingham Heartlands Hospital, University Hospital Birmingham NHS  
29 Foundation Trust, Birmingham, UK.  
30

31  
32  
33 \*Corresponding author at: Institute of Applied Health Research, University of  
34 Birmingham, Edgbaston, Birmingham B15 2TT, UK.  
35

36  
37 E mail address: [j.e.jones@bham.ac.uk](mailto:j.e.jones@bham.ac.uk), Tel number: 0121 414 7661.  
38  
39

40  
41  
42 <sup>^</sup> Current affiliation: Renal Unit, Royal Shrewsbury Hospital, Shrewsbury, UK  
43  
44  
45

46  
47 Word count: 3317  
48  
49  
50  
51  
52  
53  
54  
55  
56  
57  
58  
59  
60

## ABSTRACT

**Objective:** To explore why transplant patients experience mild-moderate distress and what support they may need.

**Design:** Qualitative study using individual in-depth interviews.

**Setting:** Four NHS Trusts in the Midlands, UK.

**Participants:** Fifteen renal transplant patients meeting the criteria for mild to moderate distress from their responses to emotion thermometers.

**Main outcome measures:** identification of the reasons for distress and support options acceptable to renal transplant patients.

**Results:** Three themes were interpreted from the data: 'I'm living with a "foreign body" inside me', 'why am I distressed?' and, 'different patients want different support'. Following their transplant, participants felt that they should be happy and content, but this was often not the case. They described a range of feelings about their transplant, such as: uncertainty about the lifespan of their new kidney, fear of transplant failure or fear of the donor having health conditions that may transfer to them. A few experienced survivors' guilt when others they had met at the dialysis unit had not received a transplant or because someone had died to enable them to receive the transplant. No longer having regular contact with the renal unit made participants feel isolated. Some participants did not initially attribute the source of their distress to their transplant. Participants' preferred support for their distress and their preferences about who should deliver it varied from peer support to seeing a psychologist.

1  
2  
3 **Conclusion:** Raising the issue of post-transplant mild-to-moderate distress with  
4 patients and encouraging them to think about and plan coping strategies pre-  
5 transplant may prove beneficial for the patient and healthcare provider. Patients  
6 should be able to choose from a variety of support options.  
7  
8  
9  
10  
11  
12  
13  
14  
15

## 16 **ARTICLE SUMMARY**

### 17 **Strengths and limitations of this study**

- 18 • This is the first study designed to explore the issue of mild-to-moderate  
19 distress in renal transplant patients.  
20
- 21 • The Interviews were a sub-set of data from a larger study.  
22
- 23 • To reduce bias on the basis of the services offered to liver patients multiple  
24 sites with different organisation and delivery of services were selected.  
25
- 26 • The diversity of participant characteristics supports the representativeness of  
27 the findings to this patient group.  
28  
29  
30  
31  
32  
33  
34  
35  
36  
37  
38  
39  
40  
41  
42  
43  
44  
45  
46  
47  
48  
49  
50  
51  
52  
53  
54  
55  
56  
57  
58  
59  
60

## INTRODUCTION

At the end of 2017, 63,162 adults were receiving renal replacement therapy in the UK<sup>1</sup>, and in the same year 3,462 transplants were performed.<sup>1</sup> Patients with end stage renal disease (ESRD) can experience distress and distress is associated with lower quality of life and greater treatment burden.<sup>2</sup> The level of emotional distress increases as the health of a patient with ESRD declines<sup>3</sup> and the prevalence of depression and anxiety in patients with ESRD is approximately four times higher than in the general adult population.<sup>4</sup> Damery et al 2019<sup>5</sup> reported that more than a third of renal dialysis patients suffer emotional distress. If suffering from mild-to-moderate distress – the unpleasant feelings or emotions that may interfere with patients' ability to cope with their kidney transplant, its physical symptoms and its treatments - patients may withdraw from treatment, be non-compliant with medication and diet<sup>6</sup> or be reluctant to engage in pre-renal replacement therapy (RRT) education and support.<sup>7</sup>

Although not a cure, for patients with ESRD, receiving a transplant provides the best chance of improving their quality of life and removing the burden of undergoing long-term dialysis treatment.<sup>8,9</sup> Nevertheless, research has shown that although receiving a transplant is the main goal for ESRD patients who are eligible for transplantation, they may continue to experience distress. For example, fear of the transplant failing can affect patient distress levels.<sup>8</sup> There is also evidence that patients may experience ongoing physical symptoms such as fatigue after receiving a transplant, and that there is substantial burden associated with taking regular immunosuppressant medication to lower the likelihood of graft rejection.<sup>10</sup> UK health

1  
2  
3 policies highlight the importance of addressing the emotional and psychological  
4 needs of renal transplant patients <sup>11</sup> and the Department of Health and NHS England  
5 advocate treating mental health on an equal footing to that of physical health by  
6 incorporating it into care pathways.<sup>12</sup> Nevertheless, evidence suggests that distress,  
7 coping, and adjustment in transplant patients largely go undiagnosed or ignored and  
8 remain untreated.<sup>13</sup> Currently, there is little evidence on mild-to-moderate distress in  
9 transplant patients and further research is required in order to understand the  
10 psychological and emotional effects of a transplant.<sup>9</sup>  
11  
12  
13  
14  
15  
16  
17  
18  
19  
20  
21  
22  
23  
24

25 As an element of a larger mixed-methods study with patients and staff,<sup>14</sup> this paper  
26 reports the findings from a qualitative study with renal transplant patients. The aims  
27 were to explore why transplant patients experience distress and what support they  
28 may need.  
29  
30  
31  
32  
33  
34  
35  
36  
37

## 38 **METHODS**

39  
40  
41 The detailed methods for the study are in the published protocol.<sup>14</sup> In brief,  
42 participants were recruited from four National Health Service (NHS) hospitals in the  
43 West Midlands, UK. The chosen sites provided maximum diversity in patient  
44 demographics, catchment size, urban and rural locations plus the organisation of  
45 psychological support services, table 1.  
46  
47  
48  
49  
50  
51  
52  
53  
54  
55

56 **Table 1.** Summary of recruitment sites  
57

| Site | Size | Catchment area | On-site renal psychologist |
|------|------|----------------|----------------------------|
|------|------|----------------|----------------------------|



|   |        |                                                                                  |     |
|---|--------|----------------------------------------------------------------------------------|-----|
| 1 | Small  | Urban inner city with sizable Black, Asian and minority ethnic (BAME) population | No  |
| 2 | Large  | Urban inner city with sizable BAME population                                    | Yes |
| 3 | Medium | Urban with surrounding rural districts majority white population                 | No  |
| 4 | Large  | Urban with surrounding rural districts majority white population                 | Yes |

To be eligible for recruitment to the qualitative study, patients had to be categorised as having mild-to-moderate distress based on their responses to the distress thermometer<sup>15</sup> included in the wider study questionnaire. A researcher contacted all participants meeting the purposive sampling criteria (age, gender and ethnicity) to ask if they were willing to take part in an interview, a consent form and participant information sheet explaining the purpose of the study and what participation would involve, was sent to those expressing interest. As well as assuring patient confidentiality, the patient information sheet provided contact details for appropriate clinical staff the participants could contact if they felt distressed or upset and would like support. The following week a researcher contacted the potential participants to confirm participation and arrange an interview date and time.

Patient interviews took place between March 2016 and May 2017 and were conducted by two experienced researchers (both female and educated to masters level) employed by the University of Birmingham. Neither researcher had experience (personally or professionally) of the topic area and none of the participants knew the researchers. Interviews were either face-to-face (at a location chosen by the

1  
2  
3 participant, either a quiet room at the hospital or at the patients home) or over the  
4  
5 telephone and lasted between 30 - 60 minutes. The interviews were in-depth and  
6  
7 semi-structured allowing the exploration of key issues without being overly  
8  
9 prescriptive about content and direction. All participants provided signed written  
10  
11 informed consent prior to their interview. Patient advisors, renal clinicians and the  
12  
13 current literature helped with the design of the topic guide, see box 1 for the areas  
14  
15 covered by the topic guide. Both researchers made field notes following each  
16  
17 interview. Interviews were audio-recorded and transcribed verbatim by a professional  
18  
19 transcribing service. Transcripts were checked against the recordings for accuracy.  
20  
21  
22  
23  
24  
25  
26  
27  
28  
29  
30  
31  
32  
33  
34  
35  
36  
37  
38  
39  
40  
41  
42  
43  
44  
45  
46  
47  
48  
49  
50  
51  
52  
53  
54  
55  
56  
57  
58  
59  
60  
Participants did not have the opportunity to review their interview transcript.

- |                                                                                                                                                                                                                                                                                                                                                                                                                                                                                                                                                                                                                                           |
|-------------------------------------------------------------------------------------------------------------------------------------------------------------------------------------------------------------------------------------------------------------------------------------------------------------------------------------------------------------------------------------------------------------------------------------------------------------------------------------------------------------------------------------------------------------------------------------------------------------------------------------------|
| <ul style="list-style-type: none"><li>a) Experience of emotional difficulties and needs linked to their illness and/or treatment, when and for how long.</li><li>b) Language used around emotional difficulties and needs, and its meaning.</li><li>c) Whether and how emotional needs have been recognised and supported by renal staff, when and by whom.</li><li>d) What, if any, support used, when and why.</li><li>e) Likes and dislikes of support used.</li><li>f) Support would have liked/would want in future, when, and from whom.</li><li>g) Key elements would want included in an emotional support intervention</li></ul> |
|-------------------------------------------------------------------------------------------------------------------------------------------------------------------------------------------------------------------------------------------------------------------------------------------------------------------------------------------------------------------------------------------------------------------------------------------------------------------------------------------------------------------------------------------------------------------------------------------------------------------------------------------|

**Box 1.** Areas covered by the topic guide

51  
52  
53  
54  
55  
56  
57  
58  
59  
60  
Analysis combined aspects of grounded theory<sup>16</sup> and thematic analysis.<sup>17</sup> Interviews were initially analysed inductively using the open coding and constant comparison aspects of grounded theory. The initial coding framework was developed by JJ and CG and was appropriately refined following comparison and discussion. Transcripts were coded using NVivo 11. For data that did not fit existing themes, new codes

were developed or existing ones revised until all data were coded by theme. The research team discussed the role of reflexivity and our potential influence on the data and its interpretation.

## RESULTS

Fifteen renal transplant patients aged between 30 and  $\geq 70$  years were recruited across the four sites, see tables 2 and 3.

**Table 2.** Summary of participant characteristics

|                                                       |                 | <b>N (%)</b> |
|-------------------------------------------------------|-----------------|--------------|
| <b>Gender</b>                                         | Male            | 7 (47)       |
|                                                       | Female          | 8 (53)       |
| <b>Age</b>                                            | 30-39           | 3 (20)       |
|                                                       | 40-49           | 2 (13)       |
|                                                       | 50-59           | 4 (27)       |
|                                                       | 60-69           | 4 (27)       |
|                                                       | $\geq 70$       | 2 (13)       |
| <b>Ethnicity</b>                                      | White/British   | 9 (60)       |
|                                                       | Indian          | 4 (27)       |
|                                                       | Caribbean       | 2 (13)       |
| <b>Length of time on dialysis prior to transplant</b> | No dialysis     | 1 (7)        |
|                                                       | 0 – 3 years     | 5 (33)       |
|                                                       | 4 – 9 years     | 0 (0)        |
|                                                       | $\geq 10$ years | 3 (20)       |
|                                                       | Unknown         | 6 (40)       |

**Table 3.** Individual participant characteristics

Three overarching themes were interpreted from the data. See table 4 for a summary of the themes and sub-themes:

**Table 4.** Themes and sub-themes

| Theme                                              | Sub-themes                                            |
|----------------------------------------------------|-------------------------------------------------------|
| I'm living with a "foreign body" inside me         | Fear/feelings about the kidney itself                 |
|                                                    | Survivors' guilt                                      |
|                                                    | Feelings of isolation                                 |
|                                                    | Impacts of medication                                 |
| Why am I distressed?                               | Initial feelings following transplant                 |
|                                                    | Association of distress to the transplant             |
|                                                    | Coping with distress                                  |
| Different patients want different types of support | Lack of information about transplants and support     |
|                                                    | Preferred types of support and, who should deliver it |

### **I'm living with a "foreign body" inside me**

#### **Fear/feelings about the kidney itself**

Living with a transplanted kidney and its associated treatments can evoke many different feelings and difficulties for patients. For many there is the fear and uncertainty of how long the transplant will last: participants talked about their transplant having a finite life and how this knowledge made them worry about what would happen in the future. Three participants had experienced a failed transplant and others understood the status of their transplant could change at any time:

*"A lot of people I knew before when I was on dialysis who had transplants, they had rejections and all sorts of things. So that's passing through your mind all the while". (M225).*

Among some patients, their fear had escalated the longer they had been with a transplant, particularly after their transplant exceeded the average lifespan. Some patients thought the longevity of a transplanted kidney was something of a lottery, which was perceived to be outside of their control and could therefore cause

1  
2  
3 distress. A few patients seemed emotionally affected by feeling they had a “foreign  
4 body” inside them (M225). One male patient talked about the possible consequences  
5 for his character of having received a female kidney. Another was anxious that his  
6 transplanted kidney might have come from someone with other health problems:  
7  
8  
9

10  
11  
12  
13 *“When I got it I started to get awful thoughts at night. ‘How did this*  
14 *person die, how old were they, did they have anything else, could*  
15 *they possibly have been HIV positive? Could there have been any*  
16 *other things that were underlying that may come forward later on?’*  
17 *and I still get those sort of thoughts at the moment”.* (M1141).  
18  
19  
20  
21  
22  
23  
24  
25  
26  
27

## 28 Survivors’ guilt

29  
30 Although a transplant is the gold standard treatment for ESRD, some participants  
31 mentioned feeling guilty about being distressed and some worried this may make  
32 them appear ungrateful. They felt they should be happy because they were lucky to  
33 receive a transplant: *“but you, at the same time you’ve got no reason to feel like*  
34 *that”.* (M389). This guilt and the fear of appearing ungrateful prevented some from  
35 seeking help when they needed it and stopped them from moving forward with their  
36 lives. Some participants worried about the donor, what happened to them and the  
37 family they left behind and others had survivors’ guilt because they had received  
38 their transplant before others who had been waiting longer:  
39  
40  
41  
42  
43  
44  
45  
46  
47  
48  
49  
50

51  
52  
53 *“When I had my transplant I felt, I suppose what you’d call it is like*  
54 *in a sense survivors guilt.....And because I had my transplant so*  
55 *quickly I just felt this huge amount of guilt because I thought all*  
56 *those patients that I had met at [hospital] and they’ve been on the*  
57  
58  
59  
60

1  
2  
3 *list for such a long time, and I thought ‘what’s the difference*  
4 *between me and them?’”.* (F413).  
5  
6  
7  
8  
9

## 10 11 Feelings of isolation

12  
13  
14 There was a perception amongst several of the participants that after receiving a  
15 transplant they were no longer part of the renal unit. They talked about feeling ‘cut-  
16 off’ and ‘abandoned’ with minimal contact. One patient explained how there had  
17 been no contact with his renal unit for several years following his transplant. Patients  
18 that had transitioned from in-centre haemodialysis (HD) seemed to feel this loss  
19 acutely - they missed the supportive relationship of staff and patients in the dialysis  
20 unit:  
21  
22  
23  
24  
25  
26  
27  
28  
29  
30

31 *“Once you’re transplanted, you don’t really have anything to do as*  
32 *such with the renal unit.....the only time I actually only ever was*  
33 *involved with the renal unit was when I was on dialysis. So that sort*  
34 *of like support was gone”.* (F726).  
35  
36  
37  
38  
39  
40  
41  
42  
43

44 Some patients experienced feelings of isolation because of the lack of understanding  
45 about their disease and its treatments among family, friends and society in general.  
46 They believed only fellow transplant patients understood their feelings:  
47  
48  
49  
50

51 *“It helped the fact talking to a stranger about it. You know, the wife*  
52 *couldn’t understand why I was like it and that, but obviously the*  
53 *stranger could because she knew the experience of it all”.* (M369).  
54  
55  
56  
57  
58  
59  
60

## Impacts of medication

Feeling down and finding their situation difficult to deal with was widespread amongst the participants. These feelings were often present when participants were dealing with the physical side effects of the anti-rejection medications such as, weight gain, puffy appearance and excessive hair growth. Other peoples' reactions to the physical changes were often difficult to deal with:

*“You know like the new face and excessive hair ..... and I found that I think the most difficult for me was that change and unfortunately when I went back to school I had a bit of , a bit of bullying went on, because of physically changing so much from what I was previously as well”. (F687).*

Participants explained how when they were on dialysis they felt in control of their body, their treatment and their lives but following transplant many felt they no longer had command of their body or life in general and yearned to take back control. Such as, not wanting to leave the house because of lack of bladder control. For the following patient the feeling of helplessness ended with her sabotaging her treatment:

*“So the reason my kidney failed was because I felt like I didn't have much control, so I kind of stopped taking my pills, my immunosuppressant. I stopped taking them for a while”. (F413).*

## Why am I distressed?

## Initial feelings following transplant

Following their transplant, participants did not expect to experience distress because they regarded a transplant as the best treatment option for an improved quality of life. Some patients had waited many years for the opportunity to receive the 'gift' of a transplant and had been optimistic:

*"I'm coming at it first time with an expectation that once you get a transplant and you start feeling better again, life is rosy, life can get back to normal". (M389).*

## Association of distress to the transplant

Whilst experiencing distress, many participants did not initially relate it to their transplant. The data suggest that the reasons for this were two-fold. Firstly, following a transplant there is an expectation from family, friends, clinicians and society in general that life will return to 'normal' and be 'wonderful' again. Secondly, renal staff did not forewarn the participants they might experience distress after receiving a transplant. Some only made the connection after agreeing to take part in this research study:

*"I never did link it to – there was something in your paperwork that I had. I thought I've never associated it with the kidney operation".*  
(M369).

## Coping with distress



1  
2  
3 Renal disease and its lifecycle can make it hard for patients to be positive  
4 about their transplant. Several participants explained how it was difficult to  
5 cope with their emotions, to move on with their lives and how they perceived  
6 family and friends, in particular, were defining them by their health condition:  
7  
8  
9  
10  
11

12  
13 *“(Sighs) Ah, again I suppose it comes back to the fact that I don’t*  
14 *want to like, yes like I know I’ve got an illness, but I don’t want to be*  
15 *that’s who I am like. You know that’s what I’m all about sort of*  
16 *thing”.* (F726).  
17  
18  
19  
20  
21  
22  
23  
24  
25

26 The majority of participants developed ways of accepting post-transplant life  
27 and found ways to cope with their distress. For some, distractions in the form  
28 of hobbies and pastimes such as gardening or reading helped them to adjust  
29 and for others it was important to maintain a positive outlook about their  
30 transplant:  
31  
32  
33  
34  
35  
36  
37

38 *“I’ve always had this positive outlook on the transplant and that.”*  
39  
40 (M225).  
41  
42  
43  
44  
45  
46  
47  
48

## 49 **Different patients want different types of support**

50 Lack of information about transplants and support

51  
52 Many participants wished the renal team had explained to them the possibility  
53 of experiencing post-transplant distress and lamented the lack of information  
54 about this and the lack of available support. Many felt that “forewarned is  
55 forearmed” and were upset they missed the opportunity to plan, in advance,  
56  
57  
58  
59  
60

1  
2  
3 coping strategies. This lack of information provision was associated with a lack  
4  
5 of continuity of care, and participants felt that staff regarded transplant patients  
6  
7 as a lower priority compared to those on dialysis:  
8  
9

10  
11 *“Time is precious, resources are scarce, I suspect that probably it*  
12  
13 *never feels as though it’s a big priority”*. (M389).  
14  
15

16  
17  
18 Preferred types of support and, who should deliver it  
19

20  
21  
22 There were, however, diverse views amongst the participants about the types of  
23  
24 support they would like to receive, and who should deliver it. For example, one  
25  
26 participant described how she thought talking to other patients might have provided  
27  
28 the support she sought.  
29

30  
31  
32 *“So with other patients in your situation, so that you could liaise with*  
33  
34 *each other to see what new life is all about”*. (F494).  
35  
36

37  
38  
39  
40 There were mixed views about the role of healthcare professionals (HCPs), with  
41  
42 some suggesting that HCPs should be more proactive in identifying distress in renal  
43  
44 transplant patients and directing them to appropriate sources of help and support.  
45  
46 Whereas others did not see this as the role of the renal team – they are there to  
47  
48 provide medical assistance and advice not psychological and emotional support.  
49  
50 Many suggested that specialist psychological services should be available as in  
51  
52 integral part of care for renal transplant patients:  
53  
54

55  
56  
57 *“I think you need psychologists as part of the renal team, a*  
58  
59 *psychologist with renal expertise”*. (F781).  
60

1  
2  
3  
4  
5  
6 However, because of the sensitive and personal nature of distress or for fear  
7  
8 of showing weakness there were those who were reluctant to talk about their  
9  
10 distress to anyone, making it difficult for HCPs to assess the support needs of  
11  
12 these patients:  
13  
14

15  
16 *“You know, it might have been something to do with medication –*  
17  
18 *I’m just guessing. But I should have told them but as I say, I mean*  
19  
20 *it’s not the sort of thing I tell people” (M369).*  
21  
22

## 23 24 25 26 **DISCUSSION**

27  
28  
29 This research has highlighted the complex relationship that renal transplant patients  
30  
31 have with their new kidney, their surprise at the source of their distress and the  
32  
33 diverse opinions on the types of support they would like to help them through their  
34  
35 distress. Current research has shown that the prevalence of distress in renal  
36  
37 transplant patients is 25% and although this is lower than the 33% of dialysis  
38  
39 patients, it is still substantial and shows that many transplant patients experience  
40  
41 ongoing issues.<sup>5</sup> There is a range of reasons why despite all expectations of living  
42  
43 an improved life, some patients became uneasy with their transplanted kidney and  
44  
45 why some did not associate their distress with their transplant and/or  
46  
47 immunosuppressant medication.  
48  
49  
50  
51  
52  
53  
54  
55

56 Patients found it difficult to accept their new kidney because of a number of different  
57  
58 situations including: the side effects of medication, fear of transplant rejection and  
59  
60

1  
2  
3 feeling obliged to make the most of life because of the “gift” of a transplant. It has  
4  
5 been reported that although fear of rejection may be the biggest stressor  
6  
7 immediately after transplant, this fear subsides with time.<sup>8</sup> However, our findings do  
8  
9 not reflect this: the majority of our participants, regardless of time since transplant,  
10  
11 reported some level of emotional distress.<sup>5</sup> Emotional problems such as depression,  
12  
13 anxiety, stress, and concerns about body image are known indicators of poor  
14  
15 medication adherence.<sup>3 6</sup> and as discussed, may result in patients wishing they were  
16  
17 back on dialysis and in some cases sabotaging their treatment. Gill,<sup>8</sup> Suzuki<sup>18</sup> and  
18  
19 Fox<sup>19</sup> found that those receiving a kidney from a living donor had a vested interest in  
20  
21 each other’s well-being and were motivated to comply with their medication regimes  
22  
23 and enjoyed an improved quality of life. For those receiving a cadaver kidney,  
24  
25 thoughts about who their kidney came from were forefront in their mind and for some  
26  
27 this had a negative effect on their relationship with their kidney – making them feel  
28  
29 as though they had a “foreign body” inside them. The emotional distress patients feel  
30  
31 may be down to unrealistically high expectations of life post-transplant and there is a  
32  
33 need for these expectations to be managed by renal services.<sup>8 20 21</sup>

34  
35  
36  
37  
38  
39  
40  
41  
42  
43 Some of our participants did not explicitly link their distress to their transplant or the  
44  
45 immunosuppressive medication. To our knowledge, there is no discussion of this  
46  
47 aspect of distress and renal transplantation in the current literature. The reason for  
48  
49 this lack of association may be that patients naively perceive that by having a  
50  
51 transplant their quality of life will improve quickly and they will return to a normal  
52  
53 life.<sup>22</sup> Given that patients receive little, if any, information about post-transplant  
54  
55 distress from HCPs<sup>3</sup> this is not surprising. Consequently, patients are often ill-  
56  
57 prepared and feel helpless when trying to cope with their distress.<sup>23</sup> Evidence has  
58  
59  
60

1  
2  
3 shown that improving coping skills,<sup>24</sup> education before and after transplantation,<sup>25</sup>  
4 and active information seeking by patients can have a beneficial effect on patients'  
5 medical and psychological problems.<sup>8 20 26</sup> The National Institute for Health and  
6 Clinical Excellence (NICE) advocate keeping patients informed at all stages of  
7 treatment and encourage the promotion of self-care and self-management skills.<sup>27</sup>  
8 However, HCPs can find it difficult to recognise distress or anxiety in patients and  
9 are unsure at which point in the disease trajectory to discuss this with their  
10 patients.<sup>28</sup> When a patient is informed, it empowers them to take control of their  
11 condition and having control can itself lower the chances of distress.<sup>6</sup> It is therefore  
12 important that HCPs provide and share information and discuss all possible  
13 outcomes and coping strategies at the appropriate time in the treatment pathway.<sup>3 21</sup>  
14  
15  
16  
17  
18  
19  
20  
21  
22  
23  
24  
25  
26  
27  
28  
29  
30  
31  
32  
33  
34  
35  
36  
37  
38  
39  
40  
41  
42  
43  
44  
45  
46  
47  
48  
49  
50  
51  
52  
53  
54  
55  
56  
57  
58  
59  
60

Not all renal transplant patients will experience distress and not all of those who do will want to receive support. This research has shown that some patients do not wish to talk about their feelings for fear of appearing ungrateful or weak, making it difficult for HCPs to understand, assess and procure appropriate support.<sup>28</sup> Even when patients do want to talk about their feelings, there is “no one size fits all” solution to the provision of support.<sup>29</sup> Different patients have different emotional needs indicating that any support offered to patients should be individualised in order to meet this variance of need.<sup>30</sup>

A limitation of this study is that the interview data analysed for this research is a subset of a larger set of data. Although the 15 in-depth interviews provided sufficient

1  
2  
3 data to answer the research questions, it is important for future research to explore  
4  
5 these areas with a more diverse and carefully stratified sample.  
6  
7  
8  
9

## 10 11 **CONCLUSIONS** 12

13  
14 Our research has highlighted a number of points: firstly, it is important to talk to  
15  
16 patients and their families pre-transplant about the possibility of experiencing mild-to-  
17  
18 moderate post-transplant distress. Secondly, patients should be encouraged to think  
19  
20 about potential coping strategies and finally, transplant patients with mild-to-  
21  
22 moderate distress should be able to choose from a variety of support options: peer  
23  
24 support; HCPs with augmented skills in detecting and managing distress; access to  
25  
26 psychology services.  
27  
28  
29  
30  
31  
32  
33

34 **Acknowledgements:** Francesca Taylor and Elaine Kidney conducted the  
35  
36 interviews. Pamela Nayyar provided administrative support for this research. The  
37  
38 patient and public involvement group of the CLAHRC West Midlands long-term  
39  
40 conditions theme and a renal patient advisory group provided advice on the design  
41  
42 of the study and the data collection tools. Finally, a huge thank you goes out to all of  
43  
44 the participants who gave up their time to talk to us.  
45  
46  
47  
48  
49  
50

51 **Author Contributors:** JJ: Conceptualisation (for this sub-study), formal analysis,  
52  
53 interpretation of data, methodology, validation, writing (original draft); GC: formal  
54  
55 analysis, validation, writing (critical review and editing); SD, & KA: interpretation of  
56  
57  
58  
59  
60

1  
2  
3 data, writing (critical review and editing), JN & JB: Conceptualisation, validation,  
4  
5 writing (critical review and editing). All authors have approved the final version.  
6  
7  
8  
9

10  
11 **Funding:** This research was funded by the National Institute for Health Research  
12  
13 Collaboration for Leadership in Applied Health Research and Care West Midlands  
14  
15 (NIHR CLAHRC WM), now recommissioned as NIHR Applied Research  
16  
17 Collaboration West Midlands. The views expressed in this publication are those of  
18  
19 the author(s) and not necessarily those of the NIHR or the Department of Health and  
20  
21 Social Care.  
22  
23  
24  
25  
26  
27  
28

29 **Competing interests:** -None  
30  
31  
32  
33

34  
35 **Ethical approval:** The Coventry and Warwickshire Research Ethics Committee  
36  
37 granted approval for this and the wider study in October 2015 [Ref 15/WM/0288].  
38  
39 The Research Governance office at each of the participating hospital trusts also  
40  
41 gave approval for the study.  
42  
43  
44  
45  
46  
47

48 **Data availability:** The research data is confidential. Participants did not give consent  
49  
50 to share their data and the ethical requirements of the study do not allow us to share  
51  
52 the study data.  
53  
54  
55  
56  
57

## 58 REFERENCES

59  
60

1. UK Renal Registry 21st Annual Report - data to 31/12/2017. Bristol, UK, 2019.
2. Soni RK. Health-related quality of life outcomes in chronic kidney disease. *Curr Opin Nephrol Hypertens*;19(2):153-60. doi: <https://doi.org/10.1097/MNH.0b013e328335f939>
3. Schell JO, Patel UD, Steinhauser KE, et al. Discussions of the kidney disease trajectory by elderly patients and nephrologists: a qualitative study. *American journal of kidney diseases : the official journal of the National Kidney Foundation* 2012;59(4):495-503. doi: <https://doi.org/10.1053/j.ajkd.2011.11.023> [published Online First: 01/04]
4. Murtagh FEM, Addington-Hall J, Higginson IJ. The Prevalence of Symptoms in End-Stage Renal Disease: A Systematic Review. *Advances in Chronic Kidney Disease* 2007;14(1):82-99. doi: <https://doi.org/10.1053/j.ackd.2006.10.001>
5. Damery S, Brown C, Sein K, et al. The prevalence of mild-to-moderate distress in patients with end-stage renal disease: results from a patient survey using the emotion thermometers in four hospital Trusts in the West Midlands, UK. *BMJ open* 2019;9(5):e027982. doi: <https://doi.org/10.1136/bmjopen-2018-027982>
6. Cukor D, Rosenthal DS, Jindal RM, et al. Depression is an important contributor to low medication adherence in hemodialyzed patients and transplant recipients. *Kidney Int* 2009;75(11):1223-29. doi: <https://doi.org/10.1038/ki.2009.51>
7. Combes G, Allen K, Sein K. Evaluation of case study sites for home therapies for people with chronic kidney disease Birmingham: University of Birmingham: West Midlands Central Health Innovation and Education Cluster; 2013 [Available from: <http://www.birmingham.ac.uk/research/activity/mds/projects/WMC-HIEC/publications.aspx> accessed May 19.
8. Gill P. Stressors and coping mechanisms in live-related renal transplantation. *J Clin Nurs* 2012;21(11-12):1622-31. doi: <https://doi.org/10.1111/j.1365-2702.2012.04085.x>
9. Kohlsdorf M. Coping Strategies Adopted by Patients With Chronic Kidney Disease in Preparation for Transplant. *Psychol Comm health* 2015;4(1):27-38. doi: <https://doi.org/10.5964/pch.v4i1.103> [published Online First: 2015-03-31]
10. Cukor D, Newville H, Jindal R. Depression and immunosuppressive medication adherence in kidney transplant patients. *General hospital psychiatry* 2008;30(4):386-7. doi: <https://doi.org/10.1016/j.genhosppsy.2007.12.003> [published Online First: 2008/07/01]
11. Department of Health, The National Service Framework for Renal Services Part 2: Chronic kidney disease, acute renal failure and end of life care. London: Department of Health 2005.
12. Department of Health, Closing the gap: priorities for essential change in mental health. London: Department of Health 2014
13. Spencer BW, Chilcot J, Farrington K. Still sad after successful renal transplantation: are we failing to recognise depression? An audit of depression screening in renal graft recipients. *Nephron Clinical practice* 2011;117(2):c106-12. doi: <https://doi.org/10.1159/000319657> [published Online First: 2010/08/10]
14. Taylor F, Taylor C, Baharani J, et al. Integrating emotional and psychological support into the end-stage renal disease pathway: a protocol for mixed methods research to identify patients' lower-level support needs and how these can most effectively be addressed. *BMC nephrology* 2016;17(1):111. doi: <https://doi.org/10.1186/s12882-016-0327-2> [published Online First: 2016/08/04]
15. Mitchell AJ, Baker-Glenn EA, Granger L, et al. Can the Distress Thermometer be improved by additional mood domains? Part I. Initial validation of the Emotion Thermometers tool. *Psycho-Oncology* 2010;19(2):125-33. doi: <https://doi.org/10.1002/pon.1523>
16. K C, L B. Qualitative interviewing and grounded theory analysis. In: Gubrium JF, Holstein AB, McKinney KD, eds. *The SAGE Handbook of interview research: The Complexity of the Craft*. California, USA: Sage publications 2012.
17. Braun V, Clarke V. *Successful Qualitative Research: a practical guide for beginners*. Thousand Oaks, CA: Sage 2013:174-179.



- 1  
2  
3 18. Suzuki A, Kenmochi T, Maruyama M, et al. Changes in quality of life in deceased versus living-  
4 donor kidney transplantations. *Transplant Proc* 2012;44(1):287-9. doi:  
5 <https://doi.org/10.1016/j.transproceed.2011.11.056> [published Online First: 2012/02/09]  
6  
7 19. Fox RC. Through the lenses of biology and sociology: Organ replacement. In: Williams SJ, Birke L,  
8 Bendelow GA, eds. *Debating Biology: Sociological reflection on health, medicine and society*.  
9 London: Routledge 2003.
- 10 20. Chilcot J, Spencer BWJ, Maple H, et al. Depression and Kidney Transplantation. *Transplantation*  
11 2014;97(7):717-21. doi: <https://doi.org/10.1097/01.TP.0000438212.72960.ae>  
12  
13 21. Pinter J, Hanson CS, Craig JC, et al. 'I feel stronger and younger all the time' —perspectives of  
14 elderly kidney transplant recipients: thematic synthesis of qualitative research. *Nephrol Dial*  
15 *Transplant* 2016;31(9):1531-40. doi: <https://doi.org/10.1093/ndt/gfv463>  
16  
17 22. Boaz A, Morgan M. Working to establish 'normality' post-transplant: a qualitative study of kidney  
18 transplant patients. *Chronic illness* 2014;10(4):247-58. doi:  
19 <https://doi.org/10.1177/1742395313504789> [published Online First: 2013/09/28]  
20  
21 23. Cormier NR, Gallo-Cruz SR, Beard RL. Navigating the new, transplanted self: how recipients  
22 manage the cognitive risks of organ transplantation. *Sociology of health & illness* 2017;39(8):1496-  
23 513. doi: <https://doi.org/10.1111/1467-9566.12610> [published Online First: 2017/10/11]  
24  
25 24. Been-Dahmen JMJ, Beck DK, Peeters MAC, et al. Evaluating the feasibility of a nurse-led self-  
26 management support intervention for kidney transplant recipients: a pilot study. *BMC nephrology*  
27 2019;20(1):143. doi: <https://doi.org/10.1186/s12882-019-1300-7> [published Online First:  
28 2019/04/29]  
29  
30 25. Curcani M, Tan M. the factors affecting the quality of life of patients who have undergone  
31 kidney transplants *Pakistan Journal of Medicine* 2012;27(5):1092-97.  
32  
33 26. Muehrer RJ, Becker BN. Life after transplantation: new transitions in quality of life and  
34 psychological distress. *Semin Dial* 2005;18(2):124-31. doi: <https://doi.org/10.1111/j.1525-139X.2005.18214.x> [published Online First: 2005/03/18]  
35  
36 27. National Institute for Health and Clinical Excellence, CG138 Patient experience in NHS services:  
37 improving the experience of care for people using adult NHS services Manchester: National Institute  
38 for Health and Clinical Excellence 2012 [Available from: <http://guidance.nice.org.uk/cg138> accessed  
39 July 2019].  
40  
41 28. Damery S, Sein K, Combes G. The prevalence, experience and management of mild to moderate  
42 distress in patients with end stage renal disease: results from a multi-centre, mixed methods  
43 research study: NIHR CLAHRC-WM, University of Birmingham, 2019.  
44  
45 29. Been-Dahmen JMJ, Grijpma JW, Ista E, et al. Self-management challenges and support needs  
46 among kidney transplant recipients: A qualitative study. *Journal of advanced nursing*  
47 2018;74(10):2393-405. doi: <https://doi.org/10.1111/jan.13730> [published Online First: 2018/06/06]  
48  
49 30. Grijpma JW, Tielen M, van Staa AL, et al. Kidney transplant patients' attitudes towards self-  
50 management support: A Q-methodological study. *Patient Educ Couns* 2016;99(5):836-43. doi:  
51 <https://doi.org/10.1016/j.pec.2015.11.018> [published Online First: 2015/12/20]  
52  
53  
54  
55  
56  
57  
58  
59  
60

## COREQ (CONsolidated criteria for REporting Qualitative research) Checklist

A checklist of items that should be included in reports of qualitative research. You must report the page number in your manuscript where you consider each of the items listed in this checklist. If you have not included this information, either revise your manuscript accordingly before submitting or note N/A.

| Topic                                          | Item No. | Guide Questions/Description                                                                                                                              | Reported on Page No. |
|------------------------------------------------|----------|----------------------------------------------------------------------------------------------------------------------------------------------------------|----------------------|
| <b>Domain 1: Research team and reflexivity</b> |          |                                                                                                                                                          |                      |
| <i>Personal characteristics</i>                |          |                                                                                                                                                          |                      |
| Interviewer/facilitator                        | 1        | Which author/s conducted the interview or focus group?                                                                                                   |                      |
| Credentials                                    | 2        | What were the researcher's credentials? E.g. PhD, MD                                                                                                     |                      |
| Occupation                                     | 3        | What was their occupation at the time of the study?                                                                                                      |                      |
| Gender                                         | 4        | Was the researcher male or female?                                                                                                                       |                      |
| Experience and training                        | 5        | What experience or training did the researcher have?                                                                                                     |                      |
| <i>Relationship with participants</i>          |          |                                                                                                                                                          |                      |
| Relationship established                       | 6        | Was a relationship established prior to study commencement?                                                                                              |                      |
| Participant knowledge of the interviewer       | 7        | What did the participants know about the researcher? e.g. personal goals, reasons for doing the research                                                 |                      |
| Interviewer characteristics                    | 8        | What characteristics were reported about the interviewer/facilitator? e.g. Bias, assumptions, reasons and interests in the research topic                |                      |
| <b>Domain 2: Study design</b>                  |          |                                                                                                                                                          |                      |
| <i>Theoretical framework</i>                   |          |                                                                                                                                                          |                      |
| Methodological orientation and Theory          | 9        | What methodological orientation was stated to underpin the study? e.g. grounded theory, discourse analysis, ethnography, phenomenology, content analysis |                      |
| <i>Participant selection</i>                   |          |                                                                                                                                                          |                      |
| Sampling                                       | 10       | How were participants selected? e.g. purposive, convenience, consecutive, snowball                                                                       |                      |
| Method of approach                             | 11       | How were participants approached? e.g. face-to-face, telephone, mail, email                                                                              |                      |
| Sample size                                    | 12       | How many participants were in the study?                                                                                                                 |                      |
| Non-participation                              | 13       | How many people refused to participate or dropped out? Reasons?                                                                                          |                      |
| <i>Setting</i>                                 |          |                                                                                                                                                          |                      |
| Setting of data collection                     | 14       | Where was the data collected? e.g. home, clinic, workplace                                                                                               |                      |
| Presence of non-participants                   | 15       | Was anyone else present besides the participants and researchers?                                                                                        |                      |
| Description of sample                          | 16       | What are the important characteristics of the sample? e.g. demographic data, date                                                                        |                      |
| <i>Data collection</i>                         |          |                                                                                                                                                          |                      |
| Interview guide                                | 17       | Were questions, prompts, guides provided by the authors? Was it pilot tested?                                                                            |                      |
| Repeat interviews                              | 18       | Were repeat interviews carried out? If yes, how many?                                                                                                    |                      |
| Audio/visual recording                         | 19       | Did the research use audio or visual recording to collect the data?                                                                                      |                      |
| Field notes                                    | 20       | Were field notes made during and/or after the interview or focus group?                                                                                  |                      |
| Duration                                       | 21       | What was the duration of the interviews or focus group?                                                                                                  |                      |
| Data saturation                                | 22       | Was data saturation discussed?                                                                                                                           |                      |
| Transcripts returned                           | 23       | Were transcripts returned to participants for comment and/or                                                                                             |                      |

| Topic                                  | Item No. | Guide Questions/Description                                                                                                        | Reported on Page No. |
|----------------------------------------|----------|------------------------------------------------------------------------------------------------------------------------------------|----------------------|
|                                        |          | correction?                                                                                                                        |                      |
| <b>Domain 3: analysis and findings</b> |          |                                                                                                                                    |                      |
| <i>Data analysis</i>                   |          |                                                                                                                                    |                      |
| Number of data coders                  | 24       | How many data coders coded the data?                                                                                               |                      |
| Description of the coding tree         | 25       | Did authors provide a description of the coding tree?                                                                              |                      |
| Derivation of themes                   | 26       | Were themes identified in advance or derived from the data?                                                                        |                      |
| Software                               | 27       | What software, if applicable, was used to manage the data?                                                                         |                      |
| Participant checking                   | 28       | Did participants provide feedback on the findings?                                                                                 |                      |
| <i>Reporting</i>                       |          |                                                                                                                                    |                      |
| Quotations presented                   | 29       | Were participant quotations presented to illustrate the themes/findings?<br>Was each quotation identified? e.g. participant number |                      |
| Data and findings consistent           | 30       | Was there consistency between the data presented and the findings?                                                                 |                      |
| Clarity of major themes                | 31       | Were major themes clearly presented in the findings?                                                                               |                      |
| Clarity of minor themes                | 32       | Is there a description of diverse cases or discussion of minor themes?                                                             |                      |

Developed from: Tong A, Sainsbury P, Craig J. Consolidated criteria for reporting qualitative research (COREQ): a 32-item checklist for interviews and focus groups. *International Journal for Quality in Health Care*. 2007. Volume 19, Number 6: pp. 349 – 357

**Once you have completed this checklist, please save a copy and upload it as part of your submission. DO NOT include this checklist as part of the main manuscript document. It must be uploaded as a separate file.**

# BMJ Open

## **“You’ve got a foreign body in there”: Renal transplantation, unexpected mild-to-moderate distress and patients’ support needs: a qualitative study**

|                                 |                                                                                                                                                                                                                                                                                                                                                                                                                                                                                  |
|---------------------------------|----------------------------------------------------------------------------------------------------------------------------------------------------------------------------------------------------------------------------------------------------------------------------------------------------------------------------------------------------------------------------------------------------------------------------------------------------------------------------------|
| Journal:                        | <i>BMJ Open</i>                                                                                                                                                                                                                                                                                                                                                                                                                                                                  |
| Manuscript ID                   | bmjopen-2019-035627.R1                                                                                                                                                                                                                                                                                                                                                                                                                                                           |
| Article Type:                   | Original research                                                                                                                                                                                                                                                                                                                                                                                                                                                                |
| Date Submitted by the Author:   | 13-Dec-2019                                                                                                                                                                                                                                                                                                                                                                                                                                                                      |
| Complete List of Authors:       | Jones, Janet ; University of Birmingham, Institute of Applied Health Research<br>Damery, Sarah; University of Birmingham, Institute of Applied Health Research<br>Allen, Kerry; University of Birmingham, Health Services Management Centre<br>Nicholas, Johann; Shrewsbury and Telford Hospital NHS Trust, Renal Unit<br>Baharani, Jyoti; Heart of England NHS Foundation Trust, Renal Medicine<br>Combes, Gill; University of Birmingham, Institute of Applied Health Research |
| <b>Primary Subject Heading</b>: | Renal medicine                                                                                                                                                                                                                                                                                                                                                                                                                                                                   |
| Secondary Subject Heading:      | Qualitative research                                                                                                                                                                                                                                                                                                                                                                                                                                                             |
| Keywords:                       | Renal transplantation < NEPHROLOGY, Anxiety disorders < PSYCHIATRY, QUALITATIVE RESEARCH                                                                                                                                                                                                                                                                                                                                                                                         |
|                                 |                                                                                                                                                                                                                                                                                                                                                                                                                                                                                  |

SCHOLARONE™  
Manuscripts



I, the Submitting Author has the right to grant and does grant on behalf of all authors of the Work (as defined in the below author licence), an exclusive licence and/or a non-exclusive licence for contributions from authors who are: i) UK Crown employees; ii) where BMJ has agreed a CC-BY licence shall apply, and/or iii) in accordance with the terms applicable for US Federal Government officers or employees acting as part of their official duties; on a worldwide, perpetual, irrevocable, royalty-free basis to BMJ Publishing Group Ltd ("BMJ") its licensees and where the relevant Journal is co-owned by BMJ to the co-owners of the Journal, to publish the Work in this journal and any other BMJ products and to exploit all rights, as set out in our [licence](#).

The Submitting Author accepts and understands that any supply made under these terms is made by BMJ to the Submitting Author unless you are acting as an employee on behalf of your employer or a postgraduate student of an affiliated institution which is paying any applicable article publishing charge ("APC") for Open Access articles. Where the Submitting Author wishes to make the Work available on an Open Access basis (and intends to pay the relevant APC), the terms of reuse of such Open Access shall be governed by a Creative Commons licence – details of these licences and which [Creative Commons](#) licence will apply to this Work are set out in our licence referred to above.

Other than as permitted in any relevant BMJ Author's Self Archiving Policies, I confirm this Work has not been accepted for publication elsewhere, is not being considered for publication elsewhere and does not duplicate material already published. I confirm all authors consent to publication of this Work and authorise the granting of this licence.

1  
2  
3 **“You’ve got a foreign body in there”:** Renal transplantation, unexpected mild-  
4 **to-moderate distress and patients’ support needs: a qualitative study**  
5  
6  
7

8 Short title: Unexpected distress in renal transplant patients  
9

10  
11 Janet Jones\*<sup>1</sup>, Sarah Damery<sup>1</sup>, Kerry Allen<sup>2</sup>, Johann Nicholas<sup>3^</sup>, Jyoti Baharani<sup>4</sup>, and  
12  
13 Gill Combes<sup>1</sup>,  
14  
15

16  
17  
18  
19 <sup>1</sup>Institute of Applied Health Research, University of Birmingham, Birmingham UK.  
20

21  
22 <sup>2</sup>Health Services Management Centre, University of Birmingham, Birmingham, UK.  
23

24  
25 <sup>3</sup>Renal Unit, New Cross Hospital, Royal Wolverhampton NHS Trust, Wolverhampton,  
26

27  
28 <sup>4</sup>Renal Unit, Birmingham Heartlands Hospital, University Hospital Birmingham NHS  
29 Foundation Trust, Birmingham, UK.  
30

31  
32  
33 \*Corresponding author at: Institute of Applied Health Research, University of  
34 Birmingham, Edgbaston, Birmingham B15 2TT, UK.  
35

36  
37 E mail address: [j.e.jones@bham.ac.uk](mailto:j.e.jones@bham.ac.uk), Tel number: 0121 414 7661.  
38  
39

40  
41  
42 <sup>^</sup> Current affiliation: Renal Unit, Royal Shrewsbury Hospital, Shrewsbury, UK  
43  
44  
45

46  
47 Word count: 3510  
48  
49  
50  
51  
52  
53  
54  
55  
56  
57  
58  
59  
60

## ABSTRACT

**Objective:** To explore why transplant patients experience unexpected mild-to-moderate distress and what support they may need.

**Design:** Qualitative study using individual in-depth interviews.

**Setting:** Four NHS Trusts in the Midlands, UK.

**Participants:** Fifteen renal transplant patients meeting the criteria for mild to moderate distress from their responses to emotion thermometers.

**Main outcome measures:** identification of the reasons for distress and support options acceptable to renal transplant patients.

**Results:** Three themes were interpreted from the data: 'I'm living with a "foreign body" inside me', 'why am I distressed?' and, 'different patients want different support'. Following their transplant, participants felt that they should be happy and content, but this was often not the case. They described a range of feelings about their transplant, such as: uncertainty about the lifespan of their new kidney, fear of transplant failure or fear of the donor having health conditions that may transfer to them. A few experienced survivors' guilt when others they had met at the dialysis unit had not received a transplant or because someone had died to enable them to receive the transplant. No longer having regular contact with the renal unit made participants feel isolated. Some participants did not initially attribute the source of their distress to their transplant. Participants' preferred support for their distress and their preferences about who should deliver it varied from peer support to seeing a psychologist.

1  
2  
3 **Conclusion:** Raising the issue of post-transplant mild-to-moderate distress with  
4 patients and encouraging them to think about and plan coping strategies pre-  
5 transplant may prove beneficial for the patient and healthcare provider. Patients  
6 should be able to choose from a variety of support options.  
7  
8  
9  
10  
11  
12  
13  
14  
15

## 16 **ARTICLE SUMMARY**

### 17 **Strengths and limitations of this study**

- 18 • This is the first study designed to explore the issue of unexpected mild-to-  
19 moderate distress in renal transplant patients.  
20
- 21 • The Interviews were a sub-set of data from a larger study.  
22
- 23 • To reduce bias on the basis of the services offered to renal patients multiple  
24 sites with different organisation and delivery of services were selected.  
25
- 26 • Participants were diverse thus the findings are representative of the wider  
27 group of renal transplant patients.  
28  
29  
30  
31  
32  
33  
34  
35  
36  
37  
38  
39  
40  
41  
42  
43  
44  
45  
46  
47  
48  
49  
50  
51  
52  
53  
54  
55  
56  
57  
58  
59  
60



## INTRODUCTION

At the end of 2017, 63,162 adults were receiving renal replacement therapy in the UK<sup>1</sup>, and in the same year 3,462 transplants were performed.<sup>1</sup> Patients with end stage renal disease (ESRD) can experience distress and distress is associated with lower quality of life and greater treatment burden.<sup>2</sup> The level of emotional distress increases as the health of a patient with ESRD declines<sup>3</sup> and the prevalence of depression and anxiety in patients with ESRD is approximately four times higher than in the general adult population.<sup>4</sup> Damery et al 2019<sup>5</sup> reported that more than a third of renal dialysis patients suffer emotional distress. If suffering from mild-to-moderate distress – the unpleasant feelings or emotions that may interfere with patients' ability to cope with their kidney transplant, its physical symptoms and its treatments - patients may withdraw from treatment, be non-compliant with medication and diet<sup>6</sup> or be reluctant to engage in pre-renal replacement therapy (RRT) education and support.<sup>7</sup>

Although not a cure, for patients with ESRD, receiving a transplant provides the best chance of improving their quality of life and removing the burden of undergoing long-term dialysis treatment.<sup>8,9</sup> Nevertheless, research has shown that although receiving a transplant is the main goal for ESRD patients who are eligible for transplantation, they may continue to experience distress. For example, fear of the transplant failing can affect patient distress levels.<sup>8</sup> There is also evidence that patients may experience ongoing physical symptoms such as fatigue after receiving a transplant, and that there is substantial burden associated with taking regular immunosuppressant medication to lower the likelihood of graft rejection.<sup>10</sup> UK health

1  
2  
3 policies highlight the importance of addressing the emotional and psychological  
4 needs of renal transplant patients <sup>11</sup> and the Department of Health and NHS England  
5 advocate treating mental health on an equal footing to that of physical health by  
6 incorporating it into care pathways.<sup>12</sup> Nevertheless, evidence suggests that distress,  
7 coping, and adjustment in transplant patients largely go undiagnosed or ignored and  
8 remain untreated.<sup>13</sup> Currently, there is little evidence on mild-to-moderate distress in  
9 transplant patients and further research is required in order to understand the  
10 psychological and emotional effects of a transplant.<sup>9 14 15</sup>

11  
12  
13  
14  
15  
16  
17  
18  
19  
20  
21  
22  
23  
24  
25 As an element of a larger mixed-methods study with patients and staff,<sup>16</sup> this paper  
26 reports the findings from a qualitative study with renal transplant patients. The aims  
27 were to explore why transplant patients experience distress and what support they  
28 may need.  
29  
30  
31  
32  
33  
34  
35  
36  
37

## 38 **METHODS**

39  
40  
41 The detailed methods for the study are in the published protocol.<sup>16</sup> In brief,  
42 participants were recruited from four National Health Service (NHS) hospitals in the  
43 West Midlands, UK. The chosen sites provided maximum diversity in patient  
44 demographics, catchment size, urban and rural locations plus the organisation of  
45 psychological support services and were categorised according to the size of the  
46 catchment area. Table 1.  
47  
48  
49  
50  
51  
52  
53  
54  
55  
56  
57  
58  
59  
60

**Table 1.** Summary of recruitment sites

| Site | Size   | Catchment area                                                                   | On-site renal psychologist |
|------|--------|----------------------------------------------------------------------------------|----------------------------|
| 1    | Small  | Urban inner city with sizable Black, Asian and minority ethnic (BAME) population | No                         |
| 2    | Large  | Urban inner city with sizable BAME population                                    | Yes                        |
| 3    | Medium | Urban with surrounding rural districts majority white population                 | No                         |
| 4    | Large  | Urban with surrounding rural districts majority white population                 | Yes                        |

To be eligible for recruitment to the qualitative study, patients had to be categorised as having mild-to-moderate distress based on their responses to the distress thermometer<sup>17</sup> included in the wider study questionnaire. Participants indicated on the questionnaire whether or not they would be willing to take part in an interview and provided their preferred contact details. A consent form and participant information sheet explaining the purpose of the interview study and what participation would involve were sent to those expressing interest. The following week those meeting the purposive sampling criteria (age, gender and ethnicity) were contacted by a researcher (FT) to confirm participation and arrange a date and time for the interview. If participants had changed their mind they were able to withdraw from this part of the wider study. As well as assuring patient confidentiality, the patient information sheet provided contact details of appropriate clinical staff the participants could contact if they felt distressed or upset and would like support. Contacting the participants to answer their questions, to arrange the interview and to

1  
2  
3 remind them a few days beforehand helped to build up a rapport with each  
4  
5 participant prior to their interview.  
6  
7  
8  
9

10  
11 Patient interviews took place between March 2016 and May 2017 and were  
12  
13 conducted by two experienced qualitative researchers (FT, EK) (both identifying as  
14  
15 female and educated to masters level) employed by the University of Birmingham.  
16  
17 Neither researcher had experience (personally or professionally) of the topic area  
18  
19 and none of the participants knew the researchers. Interviews were either face-to-  
20  
21 face (at a location chosen by the participant, either a quiet room at the hospital or at  
22  
23 the patients home) or over the telephone and lasted between 30 - 60 minutes. The  
24  
25 interviews were in-depth and semi-structured allowing the exploration of key issues  
26  
27 without being overly prescriptive about content and direction. All participants  
28  
29 provided signed written informed consent prior to their interview. Patient advisors,  
30  
31 renal clinicians and the current literature helped with the design of the topic guide,  
32  
33 see box 1 for the areas covered by the topic guide. Prior to the start of the interview  
34  
35 participants were advised to let the researcher know if they needed to take a break  
36  
37 during the interview or if they no longer wished to carry on. At the end of each  
38  
39 interview participants were asked if they had any further comments on the topics  
40  
41 covered or whether there were any important areas they felt had not been discussed.  
42  
43 Both researchers made field notes following each interview. Interviews were audio-  
44  
45 recorded and transcribed verbatim by a professional transcribing service. Transcripts  
46  
47 were checked against the recordings for accuracy. Participants did not have the  
48  
49 opportunity to review their interview transcript.  
50  
51  
52  
53  
54  
55  
56  
57  
58  
59  
60

- a) Experience of emotional difficulties and needs linked to their illness and/or treatment, when and for how long.
- b) Language used around emotional difficulties and needs, and its meaning.
- c) Whether and how emotional needs have been recognised and supported by renal staff, when and by whom.
- d) What, if any, support used, when and why.
- e) Likes and dislikes of support used.
- f) Support would have liked/would want in future, when, and from whom.
- g) Key elements would want included in an emotional support intervention

**Box 1.** Areas covered by the topic guide

Analysis combined aspects of grounded theory<sup>18</sup> and thematic analysis.<sup>19</sup> Interviews were initially analysed inductively using the open coding and constant comparison aspects of grounded theory. The initial coding framework was developed by JJ and CG and was appropriately refined following comparison and discussion. Transcripts were coded using NVivo 11. For data that did not fit existing themes, new codes were developed or existing ones revised until all data were coded by theme. The research team discussed the role of reflexivity and our potential influence on the data and its interpretation.<sup>20 21</sup>

**Patient and public involvement**

The patient and public involvement group of the NIHR CLAHRC West Midlands long-term conditions theme and a renal patient advisory group provided advice on the design of the study, the data collection tools and the selection of outcomes. All participants received a summary of the study findings.

## RESULTS

Fifteen renal transplant patients aged between 30 and  $\geq 70$  years were recruited across the four sites, see tables 2 and 3.

**Table 2.** Summary of participant characteristics

|                                                       |                 | <b>N (%)</b> |
|-------------------------------------------------------|-----------------|--------------|
| <b>Gender</b>                                         | Male            | 7 (47)       |
|                                                       | Female          | 8 (53)       |
| <b>Age</b>                                            | 30-39           | 3 (20)       |
|                                                       | 40-49           | 2 (13)       |
|                                                       | 50-59           | 4 (27)       |
|                                                       | 60-69           | 4 (27)       |
|                                                       | $\geq 70$       | 2 (13)       |
| <b>Ethnicity</b>                                      | White           | 9 (60)       |
|                                                       | Indian          | 4 (27)       |
|                                                       | Caribbean       | 2 (13)       |
| <b>Length of time on dialysis prior to transplant</b> | No dialysis     | 1 (7)        |
|                                                       | 0 – 3 years     | 5 (33)       |
|                                                       | 4 – 9 years     | 0 (0)        |
|                                                       | $\geq 10$ years | 3 (20)       |
|                                                       | Unknown         | 6 (40)       |

**Table 3.** Individual participant characteristics

| <b>ID</b> | <b>Age</b> | <b>Time on dialysis prior to transplant</b> |
|-----------|------------|---------------------------------------------|
| P129      | 40-49      | No dialysis                                 |
| P267      | 60-69      | Not stated                                  |
| P384      | 50-59      | 16 ½ years                                  |
| P413      | 30-39      | Not stated                                  |
| P494      | 50-59      | 11 years                                    |
| P687      | 30-39      | Not stated                                  |
| P726      | 50-59      | 10 years                                    |
| P781      | $\geq 70$  | 11 months                                   |
| P197      | 40-49      | 1 year                                      |

|       |       |            |
|-------|-------|------------|
| P225  | ≤70   | 3 years    |
| P369  | 60-69 | Not stated |
| P389  | 50-59 | 3 years    |
| P401  | 30-39 | Not stated |
| P1028 | 60-69 | 6 months   |
| P1141 | 60-69 | Not stated |

Three overarching themes were interpreted from the data. See table 4 for a summary of the themes and sub-themes:

**Table 4.** Themes and sub-themes

| Theme                                              | Sub-themes                                        |
|----------------------------------------------------|---------------------------------------------------|
| I'm living with a "foreign body" inside me         | Fear/feelings about the kidney itself             |
|                                                    | Survivors' guilt                                  |
|                                                    | Feelings of isolation                             |
|                                                    | Impacts of medication                             |
| Why am I distressed?                               | Expectations of living with a transplant          |
|                                                    | Coping with distress                              |
|                                                    | Lack of information about transplants and support |
| Different patients want different types of support |                                                   |

### **I'm living with a "foreign body" inside me**

Fear/feelings about the kidney itself

Living with a transplanted kidney and its associated treatments can evoke many different feelings and difficulties for patients. For many there is the fear and uncertainty of how long the transplant will last: participants talked about their transplant having a finite life and how this knowledge made them worry about what would happen in the future. Three participants had experienced a failed transplant and others understood the status of their transplant could change at any time:

1  
2  
3           *“A lot of people I knew before when I was on dialysis who had*  
4           *transplants, they had rejections and all sorts of things. So that’s*  
5           *passing through your mind all the while”.* (P225).  
6  
7  
8  
9

10  
11  
12  
13       Among some patients, their fear had escalated the longer they had been with a  
14       transplant, particularly after their transplant exceeded the average lifespan. Some  
15       patients thought the longevity of a transplanted kidney was something of a lottery,  
16       which was perceived to be outside of their control and could therefore cause  
17       distress. A few patients seemed emotionally affected by feeling they had a “foreign  
18       body” inside them (M225). One male patient talked about the possible consequences  
19       for his character of having received a female kidney. Another was anxious that his  
20       transplanted kidney might have come from someone with other health problems:  
21  
22  
23  
24  
25  
26  
27  
28  
29  
30  
31

32           *“When I got it I started to get awful thoughts at night. ‘How did this*  
33           *person die, how old were they, did they have anything else, could*  
34           *they possibly have been HIV positive? Could there have been any*  
35           *other things that were underlying that may come forward later on?’*  
36           *and I still get those sort of thoughts at the moment”.* (P1141).  
37  
38  
39  
40  
41  
42  
43  
44  
45  
46  
47

#### 48       Survivors’ guilt

49  
50       Although a transplant is the gold standard treatment for ESRD, some participants  
51       mentioned feeling guilty about being distressed and some worried this may make  
52       them appear ungrateful. They felt they should be happy because they were lucky to  
53       receive a transplant: *“but you, at the same time you’ve got no reason to feel like*  
54       *that”.* (M389). This guilt and the fear of appearing ungrateful prevented some from  
55  
56  
57  
58  
59  
60



1  
2  
3 seeking help when they needed it and stopped them from moving forward with their  
4  
5 lives. Some participants worried about the donor, what happened to them and the  
6  
7 family they left behind and others had survivors' guilt because they had received  
8  
9 their transplant before others who had been waiting longer:  
10  
11

12  
13 *"When I had my transplant I felt, I suppose what you'd call it is like*  
14  
15 *in a sense survivors guilt.....And because I had my transplant so*  
16  
17 *quickly I just felt this huge amount of guilt because I thought all*  
18  
19 *those patients that I had met at [hospital] and they've been on the*  
20  
21 *list for such a long time, and I thought 'what's the difference*  
22  
23 *between me and them?'"*. (P413).  
24  
25  
26  
27  
28  
29

### 30 Feelings of isolation

31  
32  
33 There was a perception amongst several of the participants that after receiving a  
34  
35 transplant they were no longer part of the renal unit. They talked about feeling 'cut-  
36  
37 off' and 'abandoned' with minimal contact. One patient explained how there had  
38  
39 been no contact with his renal unit for several years following his transplant. Patients  
40  
41 that had transitioned from in-centre haemodialysis (HD) seemed to feel this loss  
42  
43 acutely - they missed the supportive relationship of staff and patients in the dialysis  
44  
45 unit:  
46  
47  
48

49  
50 *"Once you're transplanted, you don't really have anything to do as*  
51  
52 *such with the renal unit.....the only time I actually only ever was*  
53  
54 *involved with the renal unit was when I was on dialysis. So that sort*  
55  
56 *of like support was gone"*. (P726).  
57  
58  
59  
60

1  
2  
3 Some patients experienced feelings of isolation because of the lack of understanding  
4 about their disease and its treatments among family, friends and society in general.  
5

6  
7 They believed only fellow transplant patients understood their feelings:  
8

9  
10 *“It helped the fact talking to a stranger about it. You know, the wife*  
11 *couldn’t understand why I was like it and that, but obviously the*  
12 *stranger could because she knew the experience of it all”*. (P369).  
13  
14  
15  
16  
17

### 18 19 20 21 Impacts of medication

22  
23 Feeling down and finding their situation difficult to deal with was widespread  
24 amongst the participants. These feelings were often present when participants were  
25 dealing with the physical side effects of the anti-rejection medications such as,  
26 weight gain, puffy appearance and excessive hair growth. Other peoples’ reactions  
27 to the physical changes were often difficult to deal with:  
28  
29  
30  
31  
32  
33  
34

35  
36 *“You know like the new face and excessive hair ..... and I found*  
37 *that I think the most difficult for me was that change and*  
38 *unfortunately when I went back to school I had a bit of , a bit of*  
39 *bullying went on, because of physically changing so much from*  
40 *what I was previously as well”*. (P687).  
41  
42  
43  
44  
45  
46  
47  
48  
49  
50

51 Participants explained how when they were on dialysis they felt in control of their  
52 body, their treatment and their lives but following transplant many felt they no longer  
53 had command of their body or life in general and yearned to take back control. Such  
54 as, not wanting to leave the house because of lack of bladder control. For the  
55  
56  
57  
58  
59  
60

1  
2  
3 following patient the feeling of helplessness ended with her sabotaging her  
4  
5 treatment:  
6  
7

8 *“So the reason my kidney failed was because I felt like I didn’t have*  
9 *much control, so I kind of stopped taking my pills, my*  
10 *immunosuppressant. I stopped taking them for a while”.* (P413).  
11  
12  
13  
14  
15  
16  
17  
18

### 19 **Why am I distressed?**

20  
21  
22 Expectations of living with a transplant  
23

24  
25 Following their transplant, participants did not expect to experience distress because  
26 they regarded a transplant as the best treatment option for an improved quality of  
27 life. Some patients had waited many years for the opportunity to receive the ‘gift’ of a  
28 transplant and had been optimistic:  
29  
30  
31  
32

33  
34 *“I’m coming at it first time with an expectation that once you get a*  
35 *transplant and you start feeling better again, life is rosy, life can get*  
36 *back to normal”.* (P389).  
37  
38  
39  
40  
41  
42  
43  
44

45  
46 Whilst experiencing distress, many participants did not initially relate it to their  
47 transplant. The data suggest that the reasons for this were two-fold. Firstly, following  
48 a transplant there is an expectation from family, friends, clinicians and society in  
49 general that life will return to ‘normal’ and be ‘wonderful’ again.  
50  
51  
52  
53

54  
55 *“I never did link it to – there was something in your paperwork that I*  
56 *had. I thought I’ve never associated it with the kidney operation”.*  
57  
58  
59 (P369).  
60

1  
2  
3  
4  
5  
6 Secondly, renal staff did not forewarn the participants they might experience  
7  
8 distress after receiving a transplant. Some only made the connection after  
9  
10 agreeing to take part in this research study:  
11  
12  
13  
14  
15

16 *But being in the hospital and then having all sorts of side effects*  
17 *which is effecting me emotionally now. And that things could have*  
18 *been told to me before, you know, I would have prepped myself up.*  
19 *Some of those things could have been addressed before. It could*  
20 *have been helpful to have been told beforehand. (P129).*  
21  
22  
23  
24  
25  
26  
27  
28  
29  
30

### 31 Coping with distress

32  
33 Renal disease and its lifecycle can make it hard for patients to be positive  
34 about their transplant. Several participants explained how it was difficult to  
35 cope with their emotions, to move on with their lives and how they perceived  
36 family and friends, in particular, were defining them by their health condition:  
37  
38  
39  
40  
41  
42

43 *“(Sighs) Ah, again I suppose it comes back to the fact that I don’t*  
44 *want to like, yes like I know I’ve got an illness, but I don’t want to be*  
45 *that’s who I am like. You know that’s what I’m all about sort of*  
46 *thing”. (P726).*  
47  
48  
49  
50  
51  
52  
53  
54  
55

56 The majority of participants developed ways of accepting post-transplant life  
57 and found ways to cope with their distress. For some, distractions in the form  
58  
59  
60

1  
2  
3 of hobbies and pastimes such as gardening or reading helped them to adjust  
4  
5 and for others it was important to maintain a positive outlook about their  
6  
7 transplant:  
8  
9

10 *"I've always had this positive outlook on the transplant and that."*  
11  
12 (P225).  
13  
14  
15  
16  
17  
18

### 19 Lack of information about transplants and support

20  
21 Many participants wished the renal team had explained to them the possibility  
22  
23 of experiencing post-transplant distress and lamented the lack of information  
24  
25 about this and the lack of available support. Many felt that "forewarned is  
26  
27 forearmed" and were upset they missed the opportunity to plan, in advance,  
28  
29 coping strategies. This lack of information provision was associated with a lack  
30  
31 of continuity of care, and participants felt that staff regarded transplant patients  
32  
33 as a lower priority compared to those on dialysis:  
34  
35  
36  
37

38 *"Time is precious, resources are scarce, I suspect that probably it*  
39  
40 *never feels as though it's a big priority".* (P389).  
41  
42  
43  
44  
45  
46

### 47 **Different patients want different types of support**

48  
49 There were, however, diverse views amongst the participants about the types of  
50  
51 support they would like to receive, and who should deliver it. For example, one  
52  
53 participant described how she thought talking to other patients might have provided  
54  
55 the support she sought.  
56  
57  
58  
59  
60

1  
2  
3           *“So with other patients in your situation, so that you could liaise with*  
4  
5           *each other to see what new life is all about”*. (P494).  
6  
7  
8  
9

10  
11       There were mixed views about the role of healthcare professionals (HCPs), with  
12  
13       some suggesting that HCPs should be more proactive in identifying distress in renal  
14  
15       transplant patients and directing them to appropriate sources of help and support.  
16  
17       Whereas others did not see this as the role of the renal team – they are there to  
18  
19       provide medical assistance and advice not psychological and emotional support.  
20  
21       Many suggested that specialist psychological services should be available as in  
22  
23       integral part of care for renal transplant patients:  
24  
25

26  
27  
28           *“I think you need psychologists as part of the renal team, a*  
29  
30           *psychologist with renal expertise”*. (P781).  
31  
32  
33  
34  
35

36  
37       However, because of the sensitive and personal nature of distress or for fear  
38  
39       of showing weakness there were those who were reluctant to talk about their  
40  
41       distress to anyone, making it difficult for HCPs to assess the support needs of  
42  
43       these patients:  
44  
45

46           *“You know, it might have been something to do with medication –*  
47  
48           *I’m just guessing. But I should have told them but as I say, I mean*  
49  
50           *it’s not the sort of thing I tell people”* (P369).  
51  
52  
53  
54  
55

## 56       **DISCUSSION**

57  
58  
59  
60

1  
2  
3 This research has highlighted the complex relationship that renal transplant patients  
4 have with their new kidney, their largely unanticipated experience of their distress  
5 and the diverse opinions on the types of support they would like to help them through  
6 their distress. Current research has shown that the prevalence of distress in renal  
7 transplant patients is 25% and although this is lower than the 33% of dialysis  
8 patients, it is still substantial and shows that many transplant patients experience  
9 ongoing issues.<sup>5</sup> There is a range of reasons why despite all expectations of living  
10 an improved life, some patients became uneasy with their transplanted kidney and  
11 why some did not associate their distress with their transplant and/or  
12 immunosuppressant medication.  
13  
14  
15  
16  
17  
18  
19  
20  
21  
22  
23  
24  
25  
26  
27  
28  
29

30 Patients found it difficult to accept their new kidney because of a number of different  
31 situations including: the side effects of medication, fear of transplant rejection and  
32 feeling obliged to make the most of life because of the “gift” of a transplant.<sup>22-25</sup> It  
33 has been reported that concern about potential lifespan of the transplanted kidney  
34 may be the biggest stressor immediately after transplant, this fear subsides with  
35 time.<sup>8</sup> However, our findings do not reflect this: the majority of our participants,  
36 regardless of time since transplant, reported some level of emotional distress.<sup>5</sup>  
37 Emotional problems such as depression, anxiety, stress, and concerns about body  
38 image are known indicators of poor medication adherence.<sup>3 6</sup> and as discussed, may  
39 result in patients wishing they were back on dialysis and in some cases sabotaging  
40 their treatment. Gill,<sup>8</sup> Suzuki<sup>26</sup> and Fox<sup>27</sup> found that those receiving a kidney from a  
41 living donor had a vested interest in each other’s well-being and were motivated to  
42 comply with their medication regimes and enjoyed an improved quality of life. For  
43 those receiving a cadaver kidney, thoughts about who their kidney came from were  
44  
45  
46  
47  
48  
49  
50  
51  
52  
53  
54  
55  
56  
57  
58  
59  
60

1  
2  
3 forefront in their mind and for some this had a negative effect on their relationship  
4 with their kidney – making them feel as though they had a “foreign body” inside  
5 them. The emotional distress patients feel may be down to unrealistically high  
6 expectations of life post-transplant and there is a need for these expectations to be  
7 managed by renal services.<sup>8 23 28</sup>

8  
9  
10  
11  
12  
13  
14  
15  
16  
17  
18 The majority of participants did not expect to experience distress after a transplant.  
19 This may be that patients naively perceive that by having a transplant their quality of  
20 life will improve quickly and they will return to a normal life.<sup>29</sup> Consequently, patients  
21 are often ill-prepared and feel helpless when trying to cope with their distress.<sup>30</sup>  
22 Evidence has shown that improving coping skills,<sup>31</sup> education before and after  
23 transplantation,<sup>32</sup> and active information seeking by patients can have a beneficial  
24 effect on patients’ medical and psychological problems.<sup>8 23 33</sup> The National Institute  
25 for Health and Care Excellence (NICE) advocate keeping patients informed at all  
26 stages of treatment and encourage the promotion of self-care and self-management  
27 skills.<sup>34</sup> However, HCPs can find it difficult to recognise distress or anxiety in patients  
28 and are unsure at which point in the disease trajectory to discuss this with their  
29 patients.<sup>35</sup> When a patient is informed, it empowers them to take control of their  
30 condition and having control can itself lower the chances of distress.<sup>6</sup> It is therefore  
31 important that HCPs provide and share information and discuss all possible  
32 outcomes and coping strategies at the appropriate time in the treatment pathway.<sup>3 28</sup>

33  
34  
35  
36  
37  
38  
39  
40  
41  
42  
43  
44  
45  
46  
47  
48  
49  
50  
51  
52  
53 30  
54  
55  
56  
57  
58  
59  
60



1  
2  
3 Not all renal transplant patients will experience distress and not all of those who do  
4 will want to receive support. This research has shown that some patients do not wish  
5 to talk about their feelings for fear of appearing ungrateful or weak, making it difficult  
6 for HCPs to understand, assess and procure appropriate support.<sup>35</sup> Even when  
7 patients do want to talk about their feelings, there is “no one size fits all” solution to  
8 the provision of support.<sup>36</sup> Different patients have different emotional needs  
9 indicating that any support offered to patients should be individualised in order to  
10 meet this variance of need.<sup>37</sup>  
11  
12  
13  
14  
15  
16  
17  
18  
19  
20  
21  
22  
23  
24

25 There were no discernible differences in the depth of data and the length of interview  
26 between those conducted face-to-face and those conducted over the telephone. A  
27 limitation of this study is that the interview data analysed for this research is a sub-  
28 set of a larger set of data. Although the 15 in-depth interviews provided sufficient  
29 data to answer the research questions, it is important for future research to explore  
30 these areas with a more diverse and carefully stratified sample.  
31  
32  
33  
34  
35  
36  
37  
38  
39  
40  
41  
42

## 43 CONCLUSIONS

44  
45 Our research has highlighted a number of points: firstly, it is important to talk to  
46 patients and their families pre-transplant about the possibility of experiencing mild-to-  
47 moderate post-transplant distress. Secondly, patients should be encouraged to think  
48 about potential coping strategies and finally, transplant patients with mild-to-  
49 moderate distress should be able to choose from a variety of support options: peer  
50 support; HCPs with augmented skills in detecting and managing distress; access to  
51 psychology services.  
52  
53  
54  
55  
56  
57  
58  
59  
60

1  
2  
3  
4  
5  
6 **Acknowledgements:** Francesca Taylor and Elaine Kidney conducted the  
7  
8 interviews. Pamela Nayyar provided administrative support for this research. The  
9  
10 patient and public involvement group of the CLAHRC West Midlands long-term  
11  
12 conditions theme and a renal patient advisory group for their invaluable help and  
13  
14 advice. Finally, a huge thank you goes out to all of the participants who gave up their  
15  
16 time to talk to us.  
17  
18  
19  
20  
21  
22

23 **Author Contributors:** JJ: Conceptualisation (for this sub-study), formal analysis,  
24  
25 interpretation of data, methodology, validation, writing (original draft); GC: formal  
26  
27 analysis, validation, writing (critical review and editing); SD, & KA: interpretation of  
28  
29 data, writing (critical review and editing), JN & JB: Conceptualisation, validation,  
30  
31 writing (critical review and editing). All authors have approved the final version.  
32  
33  
34  
35  
36  
37  
38

39 **Funding:** This research was funded by the National Institute for Health Research  
40  
41 Collaboration for Leadership in Applied Health Research and Care West Midlands  
42  
43 (NIHR CLAHRC WM), now recommissioned as NIHR Applied Research  
44  
45 Collaboration West Midlands. The views expressed in this publication are those of  
46  
47 the author(s) and not necessarily those of the NIHR or the Department of Health and  
48  
49 Social Care.  
50  
51  
52  
53  
54  
55

56 **Competing interests:** -None  
57  
58  
59  
60

1  
2  
3 **Ethical approval:** The Coventry and Warwickshire Research Ethics Committee  
4 granted approval for this and the wider study in October 2015 [Ref 15/WM/0288].  
5  
6 The Research Governance office at each of the participating hospital trusts also  
7  
8 gave approval for the study.  
9  
10

11  
12  
13  
14  
15  
16 **Data availability:** The research data is confidential. Participants did not give consent  
17 to share their data and the ethical requirements of the study do not allow us to share  
18 the study data.  
19  
20  
21  
22

## 23 24 25 26 27 28 29 30 31 32 33 34 35 36 37 38 39 40 41 42 43 44 45 46 47 48 49 50 51 52 53 54 55 56 57 58 59 60

### REFERENCES

1. UK Renal Registry 21st Annual Report - data to 31/12/2017. Bristol, UK, 2019.
2. Soni RK. Health-related quality of life outcomes in chronic kidney disease. *Curr Opin Nephrol Hypertens*;19(2):153-60. doi: <https://doi.org/10.1097/MNH.0b013e328335f939>
3. Schell JO, Patel UD, Steinhauser KE, et al. Discussions of the kidney disease trajectory by elderly patients and nephrologists: a qualitative study. *American journal of kidney diseases : the official journal of the National Kidney Foundation* 2012;59(4):495-503. doi: <https://doi.org/10.1053/j.ajkd.2011.11.023> [published Online First: 01/04]
4. Murtagh FEM, Addington-Hall J, Higginson IJ. The Prevalence of Symptoms in End-Stage Renal Disease: A Systematic Review. *Advances in Chronic Kidney Disease* 2007;14(1):82-99. doi: <https://doi.org/10.1053/j.ackd.2006.10.001>
5. Damery S, Brown C, Sein K, et al. The prevalence of mild-to-moderate distress in patients with end-stage renal disease: results from a patient survey using the emotion thermometers in four hospital Trusts in the West Midlands, UK. *BMJ open* 2019;9(5):e027982. doi: <https://doi.org/10.1136/bmjopen-2018-027982>
6. Cukor D, Rosenthal DS, Jindal RM, et al. Depression is an important contributor to low medication adherence in hemodialyzed patients and transplant recipients. *Kidney Int* 2009;75(11):1223-29. doi: <https://doi.org/10.1038/ki.2009.51>
7. Combes G, Allen K, Sein K. Evaluation of case study sites for home therapies for people with chronic kidney disease Birmingham: University of Birmingham: West Midlands Central Health Innovation and Education Cluster; 2013 [Available from: <http://www.birmingham.ac.uk/research/activity/mds/projects/WMC-HIEC/publications.aspx> accessed May 19.
8. Gill P. Stressors and coping mechanisms in live-related renal transplantation. *J Clin Nurs* 2012;21(11-12):1622-31. doi: <https://doi.org/10.1111/j.1365-2702.2012.04085.x>
9. Kohlsdorf M. Coping Strategies Adopted by Patients With Chronic Kidney Disease in Preparation for Transplant. *Psychol Comm health* 2015;4(1):27-38. doi: <https://doi.org/10.5964/pch.v4i1.103> [published Online First: 2015-03-31]

10. Cukor D, Newville H, Jindal R. Depression and immunosuppressive medication adherence in kidney transplant patients. *General hospital psychiatry* 2008;30(4):386-7. doi: <https://doi.org/10.1016/j.genhosppsych.2007.12.003> [published Online First: 2008/07/01]
11. Department of Health, The National Service Framework for Renal Services Part 2: Chronic kidney disease, acute renal failure and end of life care. London: Department of Health 2005.
12. Department of Health, Closing the gap: priorities for essential change in mental health. London: Department of Health 2014
13. Spencer BW, Chilcot J, Farrington K. Still sad after successful renal transplantation: are we failing to recognise depression? An audit of depression screening in renal graft recipients. *Nephron Clinical practice* 2011;117(2):c106-12. doi: <https://doi.org/10.1159/000319657> [published Online First: 2010/08/10]
14. Almgren M. The meaning of being in uncertainty after heart transplantation - an unrevealed source to distress. *European Journal of Cardiovascular Nursing* 2017;16(2):167-75. doi: 10.1177/1474515116648240
15. Mauthner OE. Heart transplants: Identity disruption, bodily integrity and interconnectedness. *Health: An Interdisciplinary Journal for the Social Study of Health, Illness & Medicine* 2014;19(6):578-95. doi: 10.1177/1363459314560067
16. Taylor F, Taylor C, Baharani J, et al. Integrating emotional and psychological support into the end-stage renal disease pathway: a protocol for mixed methods research to identify patients' lower-level support needs and how these can most effectively be addressed. *BMC nephrology* 2016;17(1):111. doi: <https://doi.org/10.1186/s12882-016-0327-2> [published Online First: 2016/08/04]
17. Mitchell AJ, Baker-Glenn EA, Granger L, et al. Can the Distress Thermometer be improved by additional mood domains? Part I. Initial validation of the Emotion Thermometers tool. *Psycho-Oncology* 2010;19(2):125-33. doi: <https://doi.org/10.1002/pon.1523>
18. K C, L B. Qualitative interviewing and grounded theory analysis. In: Gubrium JF, Holstein AB, McKinney KD, eds. *The SAGE Handbook of interview research: The Complexity of the Craft*. California, USA: Sage publications 2012.
19. Braun V, Clarke V. *Successful Qualitative Research: a practical guide for beginners*. Thousand Oaks, CA: Sage 2013:174-179.
20. Alley S, Jackson SF, Shakya YB. Reflexivity: A Methodological Tool in the Knowledge Translation Process? *Health Promotion Practice* 2015;16(3):426-31. doi: 10.1177/1524839914568344
21. Berger R. Now I see it, now I don't: researcher's position and reflexivity in qualitative research. *Qualitative Research* 2015;15(2):219-34. doi: 10.1177/1468794112468475
22. Achille MA, Ouellette A, Fournier S, et al. Impact of Transplant-Related Stressors and Feelings of Indebtedness on Psychosocial Adjustment Following Kidney Transplantation. *Journal of Clinical Psychology in Medical Settings* 2004;11(1):63-73. doi: 10.1023/B:JOCS.0000016271.10786.ee
23. Chilcot J, Spencer BWJ, Maple H, et al. Depression and Kidney Transplantation. *Transplantation* 2014;97(7):717-21. doi: <https://doi.org/10.1097/01.TP.0000438212.72960.ae>
24. Shemesh Y, Peles-Bortz A, Peled Y, et al. Feelings of indebtedness and guilt toward donor and immunosuppressive medication adherence among heart transplant (HTx) patients, as assessed in a cross-sectional study with the Basel Assessment of Adherence to Immunosuppressive Medications Scale (BAASIS). *Clinical Transplantation* 2017;31(10):e13053. doi: 10.1111/ctr.13053
25. Poole J, Ward J, Deluca E, et al. Grief and loss for patients before and after heart transplant. *Heart & lung : the journal of critical care* 2016;45(3):193. doi: 10.1016/j.hrtlng.2016.01.006
26. Suzuki A, Kenmochi T, Maruyama M, et al. Changes in quality of life in deceased versus living-donor kidney transplantations. *Transplant Proc* 2012;44(1):287-9. doi: <https://doi.org/10.1016/j.transproceed.2011.11.056> [published Online First: 2012/02/09]
27. Fox RC. Through the lenses of biology and sociology: Organ replacement. In: Williams SJ, Birke L, Bendelow GA, eds. *Debating Biology: Sociological reflection on health, medicine and society*. London: Routledge 2003.

- 1  
2  
3 28. Pinter J, Hanson CS, Craig JC, et al. 'I feel stronger and younger all the time'—perspectives of  
4 elderly kidney transplant recipients: thematic synthesis of qualitative research. *Nephrol Dial*  
5 *Transplant* 2016;31(9):1531-40. doi: <https://doi.org/10.1093/ndt/gfv463>  
6  
7 29. Boaz A, Morgan M. Working to establish 'normality' post-transplant: a qualitative study of kidney  
8 transplant patients. *Chronic illness* 2014;10(4):247-58. doi:  
9 <https://doi.org/10.1177/1742395313504789> [published Online First: 2013/09/28]  
10  
11 30. Cormier NR, Gallo-Cruz SR, Beard RL. Navigating the new, transplanted self: how recipients  
12 manage the cognitive risks of organ transplantation. *Sociology of health & illness* 2017;39(8):1496-  
13 513. doi: <https://doi.org/10.1111/1467-9566.12610> [published Online First: 2017/10/11]  
14  
15 31. Been-Dahmen JMJ, Beck DK, Peeters MAC, et al. Evaluating the feasibility of a nurse-led self-  
16 management support intervention for kidney transplant recipients: a pilot study. *BMC nephrology*  
17 2019;20(1):143. doi: <https://doi.org/10.1186/s12882-019-1300-7> [published Online First:  
18 2019/04/29]  
19  
20 32. Curcani M, Tan M. the factors affecting the quality of life of patients who have undergone  
21 kidney transplants *Pakistan Journal of Medicine* 2012;27(5):1092-97.  
22  
23 33. Muehrer RJ, Becker BN. Life after transplantation: new transitions in quality of life and  
24 psychological distress. *Semin Dial* 2005;18(2):124-31. doi: [https://doi.org/10.1111/j.1525-](https://doi.org/10.1111/j.1525-139X.2005.18214.x)  
25 [139X.2005.18214.x](https://doi.org/10.1111/j.1525-139X.2005.18214.x) [published Online First: 2005/03/18]  
26  
27 34. National Institute for Health and Clinical Excellence, CG138 Patient experience in NHS services:  
28 improving the experience of care for people using adult NHS services Manchester: National Institute  
29 for Health and Clinical Excellence 2012 [Available from: <http://guidance.nice.org.uk/cg138> accessed  
30 July 2019].  
31  
32 35. Damery S, Sein K, Combes G. The prevalence, experience and management of mild to moderate  
33 distress in patients with end stage renal disease: results from a multi-centre, mixed methods  
34 research study: NIHR CLAHRC-WM, University of Birmingham, 2019.  
35  
36 36. Been-Dahmen JMJ, Grijpma JW, Ista E, et al. Self-management challenges and support needs  
37 among kidney transplant recipients: A qualitative study. *Journal of advanced nursing*  
38 2018;74(10):2393-405. doi: <https://doi.org/10.1111/jan.13730> [published Online First: 2018/06/06]  
39  
40 37. Grijpma JW, Tielen M, van Staa AL, et al. Kidney transplant patients' attitudes towards self-  
41 management support: A Q-methodological study. *Patient Educ Couns* 2016;99(5):836-43. doi:  
42 <https://doi.org/10.1016/j.pec.2015.11.018> [published Online First: 2015/12/20]  
43  
44  
45  
46  
47  
48  
49  
50  
51  
52  
53  
54  
55  
56  
57  
58  
59  
60

## COREQ (CONsolidated criteria for REporting Qualitative research) Checklist

A checklist of items that should be included in reports of qualitative research. You must report the page number in your manuscript where you consider each of the items listed in this checklist. If you have not included this information, either revise your manuscript accordingly before submitting or note N/A.

| Topic                                          | Item No. | Guide Questions/Description                                                                                                                              | Reported on Page No. |
|------------------------------------------------|----------|----------------------------------------------------------------------------------------------------------------------------------------------------------|----------------------|
| <b>Domain 1: Research team and reflexivity</b> |          |                                                                                                                                                          |                      |
| <i>Personal characteristics</i>                |          |                                                                                                                                                          |                      |
| Interviewer/facilitator                        | 1        | Which author/s conducted the interview or focus group?                                                                                                   |                      |
| Credentials                                    | 2        | What were the researcher's credentials? E.g. PhD, MD                                                                                                     |                      |
| Occupation                                     | 3        | What was their occupation at the time of the study?                                                                                                      |                      |
| Gender                                         | 4        | Was the researcher male or female?                                                                                                                       |                      |
| Experience and training                        | 5        | What experience or training did the researcher have?                                                                                                     |                      |
| <i>Relationship with participants</i>          |          |                                                                                                                                                          |                      |
| Relationship established                       | 6        | Was a relationship established prior to study commencement?                                                                                              |                      |
| Participant knowledge of the interviewer       | 7        | What did the participants know about the researcher? e.g. personal goals, reasons for doing the research                                                 |                      |
| Interviewer characteristics                    | 8        | What characteristics were reported about the interviewer/facilitator? e.g. Bias, assumptions, reasons and interests in the research topic                |                      |
| <b>Domain 2: Study design</b>                  |          |                                                                                                                                                          |                      |
| <i>Theoretical framework</i>                   |          |                                                                                                                                                          |                      |
| Methodological orientation and Theory          | 9        | What methodological orientation was stated to underpin the study? e.g. grounded theory, discourse analysis, ethnography, phenomenology, content analysis |                      |
| <i>Participant selection</i>                   |          |                                                                                                                                                          |                      |
| Sampling                                       | 10       | How were participants selected? e.g. purposive, convenience, consecutive, snowball                                                                       |                      |
| Method of approach                             | 11       | How were participants approached? e.g. face-to-face, telephone, mail, email                                                                              |                      |
| Sample size                                    | 12       | How many participants were in the study?                                                                                                                 |                      |
| Non-participation                              | 13       | How many people refused to participate or dropped out? Reasons?                                                                                          |                      |
| <i>Setting</i>                                 |          |                                                                                                                                                          |                      |
| Setting of data collection                     | 14       | Where was the data collected? e.g. home, clinic, workplace                                                                                               |                      |
| Presence of non-participants                   | 15       | Was anyone else present besides the participants and researchers?                                                                                        |                      |
| Description of sample                          | 16       | What are the important characteristics of the sample? e.g. demographic data, date                                                                        |                      |
| <i>Data collection</i>                         |          |                                                                                                                                                          |                      |
| Interview guide                                | 17       | Were questions, prompts, guides provided by the authors? Was it pilot tested?                                                                            |                      |
| Repeat interviews                              | 18       | Were repeat interviews carried out? If yes, how many?                                                                                                    |                      |
| Audio/visual recording                         | 19       | Did the research use audio or visual recording to collect the data?                                                                                      |                      |
| Field notes                                    | 20       | Were field notes made during and/or after the interview or focus group?                                                                                  |                      |
| Duration                                       | 21       | What was the duration of the interviews or focus group?                                                                                                  |                      |
| Data saturation                                | 22       | Was data saturation discussed?                                                                                                                           |                      |
| Transcripts returned                           | 23       | Were transcripts returned to participants for comment and/or                                                                                             |                      |

| Topic                                  | Item No. | Guide Questions/Description                                                                                                        | Reported on Page No. |
|----------------------------------------|----------|------------------------------------------------------------------------------------------------------------------------------------|----------------------|
|                                        |          | correction?                                                                                                                        |                      |
| <b>Domain 3: analysis and findings</b> |          |                                                                                                                                    |                      |
| <i>Data analysis</i>                   |          |                                                                                                                                    |                      |
| Number of data coders                  | 24       | How many data coders coded the data?                                                                                               |                      |
| Description of the coding tree         | 25       | Did authors provide a description of the coding tree?                                                                              |                      |
| Derivation of themes                   | 26       | Were themes identified in advance or derived from the data?                                                                        |                      |
| Software                               | 27       | What software, if applicable, was used to manage the data?                                                                         |                      |
| Participant checking                   | 28       | Did participants provide feedback on the findings?                                                                                 |                      |
| <i>Reporting</i>                       |          |                                                                                                                                    |                      |
| Quotations presented                   | 29       | Were participant quotations presented to illustrate the themes/findings?<br>Was each quotation identified? e.g. participant number |                      |
| Data and findings consistent           | 30       | Was there consistency between the data presented and the findings?                                                                 |                      |
| Clarity of major themes                | 31       | Were major themes clearly presented in the findings?                                                                               |                      |
| Clarity of minor themes                | 32       | Is there a description of diverse cases or discussion of minor themes?                                                             |                      |

Developed from: Tong A, Sainsbury P, Craig J. Consolidated criteria for reporting qualitative research (COREQ): a 32-item checklist for interviews and focus groups. *International Journal for Quality in Health Care*. 2007. Volume 19, Number 6: pp. 349 – 357

**Once you have completed this checklist, please save a copy and upload it as part of your submission. DO NOT include this checklist as part of the main manuscript document. It must be uploaded as a separate file.**

# BMJ Open

## **“You’ve got a foreign body in there”: Renal transplantation, unexpected mild-to-moderate distress and patients’ support needs: a qualitative study**

|                                 |                                                                                                                                                                                                                                                                                                                                                                                                                                                                                  |
|---------------------------------|----------------------------------------------------------------------------------------------------------------------------------------------------------------------------------------------------------------------------------------------------------------------------------------------------------------------------------------------------------------------------------------------------------------------------------------------------------------------------------|
| Journal:                        | <i>BMJ Open</i>                                                                                                                                                                                                                                                                                                                                                                                                                                                                  |
| Manuscript ID                   | bmjopen-2019-035627.R2                                                                                                                                                                                                                                                                                                                                                                                                                                                           |
| Article Type:                   | Original research                                                                                                                                                                                                                                                                                                                                                                                                                                                                |
| Date Submitted by the Author:   | 20-Jan-2020                                                                                                                                                                                                                                                                                                                                                                                                                                                                      |
| Complete List of Authors:       | Jones, Janet ; University of Birmingham, Institute of Applied Health Research<br>Damery, Sarah; University of Birmingham, Institute of Applied Health Research<br>Allen, Kerry; University of Birmingham, Health Services Management Centre<br>Nicholas, Johann; Shrewsbury and Telford Hospital NHS Trust, Renal Unit<br>Baharani, Jyoti; Heart of England NHS Foundation Trust, Renal Medicine<br>Combes, Gill; University of Birmingham, Institute of Applied Health Research |
| <b>Primary Subject Heading</b>: | Renal medicine                                                                                                                                                                                                                                                                                                                                                                                                                                                                   |
| Secondary Subject Heading:      | Qualitative research                                                                                                                                                                                                                                                                                                                                                                                                                                                             |
| Keywords:                       | Renal transplantation < NEPHROLOGY, Anxiety disorders < PSYCHIATRY, QUALITATIVE RESEARCH                                                                                                                                                                                                                                                                                                                                                                                         |
|                                 |                                                                                                                                                                                                                                                                                                                                                                                                                                                                                  |

SCHOLARONE™  
Manuscripts





I, the Submitting Author has the right to grant and does grant on behalf of all authors of the Work (as defined in the below author licence), an exclusive licence and/or a non-exclusive licence for contributions from authors who are: i) UK Crown employees; ii) where BMJ has agreed a CC-BY licence shall apply, and/or iii) in accordance with the terms applicable for US Federal Government officers or employees acting as part of their official duties; on a worldwide, perpetual, irrevocable, royalty-free basis to BMJ Publishing Group Ltd ("BMJ") its licensees and where the relevant Journal is co-owned by BMJ to the co-owners of the Journal, to publish the Work in this journal and any other BMJ products and to exploit all rights, as set out in our [licence](#).

The Submitting Author accepts and understands that any supply made under these terms is made by BMJ to the Submitting Author unless you are acting as an employee on behalf of your employer or a postgraduate student of an affiliated institution which is paying any applicable article publishing charge ("APC") for Open Access articles. Where the Submitting Author wishes to make the Work available on an Open Access basis (and intends to pay the relevant APC), the terms of reuse of such Open Access shall be governed by a Creative Commons licence – details of these licences and which [Creative Commons](#) licence will apply to this Work are set out in our licence referred to above.

Other than as permitted in any relevant BMJ Author's Self Archiving Policies, I confirm this Work has not been accepted for publication elsewhere, is not being considered for publication elsewhere and does not duplicate material already published. I confirm all authors consent to publication of this Work and authorise the granting of this licence.

1  
2  
3 **“You’ve got a foreign body in there”**: Renal transplantation, unexpected mild-  
4 **to-moderate distress and patients’ support needs: a qualitative study**  
5  
6  
7

8 Short title: Unexpected distress in renal transplant patients  
9

10  
11 Janet Jones\*<sup>1</sup>, Sarah Damery<sup>1</sup>, Kerry Allen<sup>2</sup>, Johann Nicholas<sup>3^</sup>, Jyoti Baharani<sup>4</sup>, and  
12  
13 Gill Combes<sup>1</sup>,  
14  
15

16  
17  
18  
19 <sup>1</sup>Institute of Applied Health Research, University of Birmingham, Birmingham UK.  
20

21  
22 <sup>2</sup>Health Services Management Centre, University of Birmingham, Birmingham, UK.  
23

24  
25 <sup>3</sup>Renal Unit, New Cross Hospital, Royal Wolverhampton NHS Trust, Wolverhampton,  
26

27  
28 <sup>4</sup>Renal Unit, Birmingham Heartlands Hospital, University Hospital Birmingham NHS  
29 Foundation Trust, Birmingham, UK.  
30

31  
32  
33 \*Corresponding author at: Institute of Applied Health Research, University of  
34 Birmingham, Edgbaston, Birmingham B15 2TT, UK.  
35

36  
37 E mail address: [j.e.jones@bham.ac.uk](mailto:j.e.jones@bham.ac.uk), Tel number: 0121 414 7661.  
38  
39

40  
41  
42 <sup>^</sup> Current affiliation: Renal Unit, Royal Shrewsbury Hospital, Shrewsbury, UK  
43  
44  
45

46  
47 Word count: 3555  
48  
49  
50  
51  
52  
53  
54  
55  
56  
57  
58  
59  
60

## ABSTRACT

**Objective:** To explore why transplant patients experience unexpected mild-to moderate distress and what support they may need.

**Design:** Qualitative study using individual in-depth interviews.

**Setting:** Four NHS Trusts in the Midlands, UK.

**Participants:** Fifteen renal transplant patients meeting the criteria for mild to moderate distress from their responses to emotion thermometers.

**Main outcome measures:** identification of the reasons for distress and support options acceptable to renal transplant patients.

**Results:** Three themes were interpreted from the data: 'I'm living with a "foreign body" inside me', 'why am I distressed?' and, 'different patients want different support'. Following their transplant, participants felt that they should be happy and content, but this was often not the case. They described a range of feelings about their transplant, such as: uncertainty about the lifespan of their new kidney, fear of transplant failure or fear of the donor having health conditions that may transfer to them. A few experienced survivors' guilt when others they had met at the dialysis unit had not received a transplant or because someone had died to enable them to receive the transplant. No longer having regular contact with the renal unit made participants feel isolated. Some participants did not initially attribute the source of their distress to their transplant. Participants' preferred support for their distress and their preferences about who should deliver it varied from peer support to seeing a psychologist.

1  
2  
3 **Conclusion:** Raising the issue of post-transplant mild-to-moderate distress with  
4 patients and encouraging them to think about and plan coping strategies pre-  
5 transplant may prove beneficial for the patient and healthcare provider. Patients  
6 should be able to choose from a variety of support options.  
7  
8  
9  
10  
11  
12  
13  
14  
15

## 16 **ARTICLE SUMMARY**

### 17 **Strengths and limitations of this study**

- 18 • This is the first study designed to explore the issue of unexpected mild-to-  
19 moderate distress in renal transplant patients.  
20
- 21 • The Interviews were a sub-set of data from a larger study.  
22
- 23 • To reduce bias on the basis of the services offered to renal patients multiple  
24 sites with different organisation and delivery of services were selected.  
25
- 26 • Participants were diverse thus the findings are more representative of the  
27 wider group of renal transplant patients.  
28  
29  
30  
31  
32  
33  
34  
35  
36  
37  
38  
39  
40  
41  
42  
43  
44  
45  
46  
47  
48  
49  
50  
51  
52  
53  
54  
55  
56  
57  
58  
59  
60

## INTRODUCTION

At the end of 2017, 63,162 adults were receiving renal replacement therapy in the UK<sup>1</sup>, and in the same year 3,462 transplants were performed.<sup>1</sup> Patients with end stage renal disease (ESRD) can experience distress and distress is associated with lower quality of life and greater treatment burden.<sup>2</sup> The level of emotional distress increases as the health of a patient with ESRD declines<sup>3</sup> and the prevalence of depression and anxiety in patients with ESRD is approximately four times higher than in the general adult population.<sup>4</sup> Damery et al 2019<sup>5</sup> reported that more than a third of renal dialysis patients suffer emotional distress. If suffering from mild-to-moderate distress – the unpleasant feelings or emotions that may interfere with patients' ability to cope with their kidney transplant, its physical symptoms and its treatments - patients may withdraw from treatment, be non-compliant with medication and diet<sup>6</sup> or be reluctant to engage in pre-renal replacement therapy (RRT) education and support.<sup>7</sup>

Although not a cure, for patients with ESRD, receiving a transplant provides the best chance of improving their quality of life and removing the burden of undergoing long-term dialysis treatment.<sup>8,9</sup> Nevertheless, research has shown that although receiving a transplant is the main goal for ESRD patients who are eligible for transplantation, they may continue to experience distress. For example, fear of the transplant failing can affect patient distress levels.<sup>8</sup> There is also evidence that patients may experience ongoing physical symptoms such as fatigue after receiving a transplant, and that there is substantial burden associated with taking regular immunosuppressant medication to lower the likelihood of graft rejection.<sup>10</sup> UK health

1  
2  
3 policies highlight the importance of addressing the emotional and psychological  
4 needs of renal transplant patients <sup>11</sup> and the Department of Health and NHS England  
5 advocate treating mental health on an equal footing to that of physical health by  
6 incorporating it into care pathways.<sup>12</sup> Nevertheless, evidence suggests that distress,  
7 coping, and adjustment in transplant patients largely go undiagnosed or ignored and  
8 remain untreated.<sup>13</sup> Currently, there is little evidence on mild-to-moderate distress in  
9 transplant patients and further research is required in order to understand the  
10 psychological and emotional effects of a transplant.<sup>9 14 15</sup>

11  
12  
13  
14  
15  
16  
17  
18  
19  
20  
21  
22  
23  
24  
25 As an element of a larger mixed-methods study with patients and staff,<sup>16</sup> this paper  
26 reports the findings from a qualitative study with renal transplant patients. The aims  
27 were to explore why transplant patients experience distress and what support they  
28 may need.  
29  
30  
31  
32  
33  
34  
35  
36  
37

## 38 **METHODS**

39  
40  
41 The detailed methods for the study are in the published protocol.<sup>16</sup> In brief,  
42 participants were recruited from four National Health Service (NHS) hospitals in the  
43 West Midlands, UK. The chosen sites provided maximum diversity in patient  
44 demographics, catchment size, urban and rural locations plus the organisation of  
45 psychological support services and were categorised according to the size of the  
46 catchment area. Table 1.  
47  
48  
49  
50  
51  
52  
53  
54  
55  
56  
57  
58  
59  
60

**Table 1.** Summary of recruitment sites

| Site | Size   | Catchment area                                                                   | On-site renal psychologist |
|------|--------|----------------------------------------------------------------------------------|----------------------------|
| 1    | Small  | Urban inner city with sizable Black, Asian and minority ethnic (BAME) population | No                         |
| 2    | Large  | Urban inner city with sizable BAME population                                    | Yes                        |
| 3    | Medium | Urban with surrounding rural districts majority white population                 | No                         |
| 4    | Large  | Urban with surrounding rural districts majority white population                 | Yes                        |

To be eligible for recruitment to the qualitative study, patients had to be categorised as having mild-to-moderate distress based on their responses to the distress thermometer<sup>17</sup> included in the wider study questionnaire. Participants indicated on the questionnaire whether or not they would be willing to take part in an interview and provided their preferred contact details. A consent form and participant information sheet explaining the purpose of the interview study and what participation would involve were sent to those expressing interest. The following week those meeting the purposive sampling criteria (age, sex and ethnicity) were contacted by a researcher (FT) to confirm participation and arrange a date and time for the interview. If participants had changed their mind they were able to withdraw from this part of the wider study. As well as assuring patient confidentiality, the patient information sheet provided contact details of appropriate clinical staff the participants could contact if they felt distressed or upset and would like support. Contacting the participants to answer their questions, to arrange the interview and to

1  
2  
3 remind them a few days beforehand helped to build up a rapport with each  
4  
5 participant prior to their interview.  
6  
7  
8  
9

10  
11 Patient interviews took place between March 2016 and May 2017 and were  
12  
13 conducted by two experienced qualitative researchers (FT, EK) (both identifying as  
14  
15 female and educated to masters level) employed by the University of Birmingham.  
16  
17 Neither researcher had experience (personally or professionally) of the topic area  
18  
19 and none of the participants knew the researchers. Interviews were either face-to-  
20  
21 face (at a location chosen by the participant, either a quiet room at the hospital or at  
22  
23 the patients home) or over the telephone and lasted between 30 - 60 minutes. The  
24  
25 interviews were in-depth and semi-structured allowing the exploration of key issues  
26  
27 without being overly prescriptive about content and direction. All participants  
28  
29 provided signed written informed consent prior to their interview. Patient advisors,  
30  
31 renal clinicians and the current literature helped with the design of the topic guide,  
32  
33 see box 1 for the areas covered by the topic guide. Prior to the start of the interview  
34  
35 participants were advised to let the researcher know if they needed to take a break  
36  
37 during the interview or if they no longer wished to carry on. Although included in the  
38  
39 participant information sheet participants were reminded that taking part in an  
40  
41 interview would not impact on the care they receive. At the end of each interview  
42  
43 participants were asked if they had any further comments on the topics covered or  
44  
45 whether there were any important areas they felt had not been discussed. Both  
46  
47 researchers made field notes following each interview. Interviews were audio-  
48  
49 recorded and transcribed verbatim by a professional transcribing service. Transcripts  
50  
51 were checked against the recordings for accuracy. Participants did not have the  
52  
53 opportunity to review their interview transcript.  
54  
55  
56  
57  
58  
59  
60



- a) Experience of emotional difficulties and needs linked to their illness and/or treatment, when and for how long.
- b) Language used around emotional difficulties and needs, and its meaning.
- c) Whether and how emotional needs have been recognised and supported by renal staff, when and by whom.
- d) What, if any, support used, when and why.
- e) Likes and dislikes of support used.
- f) Support would have liked/would want in future, when, and from whom.
- g) Key elements would want included in an emotional support intervention

**Box 1.** Areas covered by the topic guide

Analysis combined aspects of grounded theory<sup>18</sup> and thematic analysis.<sup>19</sup> Interviews were initially analysed inductively using the open coding and constant comparison aspects of grounded theory. The initial coding framework was developed by JJ and CG and was appropriately refined following comparison and discussion. Transcripts were coded using NVivo 11. For data that did not fit existing themes, new codes were developed or existing ones revised until all data were coded by theme.

Following the completion of data collection the research team met and agreed that in order to understand participants' experiences and to help inform future practice a generic pragmatic hybrid approach to analysis was appropriate<sup>20 21</sup>. The research team also discussed the role of reflexivity and how our personal views and experiences may influence our interpretation of the data.<sup>22 23</sup>

**Patient and public involvement**

The patient and public involvement group of the NIHR CLAHRC West Midlands long-term conditions theme and a renal patient advisory group provided advice on the design of the study, the data collection tools and the selection of outcomes. All participants received a summary of the study findings.

## RESULTS

Fifteen renal transplant patients aged between 30 and  $\geq 70$  years were recruited across the four sites, see tables 2 and 3.

**Table 2.** Summary of participant characteristics

|                                                       |                 | <b>N (%)</b> |
|-------------------------------------------------------|-----------------|--------------|
| <b>Sex (participant self-identified)</b>              | Male            | 7 (47)       |
|                                                       | Female          | 8 (53)       |
| <b>Age</b>                                            | 30-39           | 3 (20)       |
|                                                       | 40-49           | 2 (13)       |
|                                                       | 50-59           | 4 (27)       |
|                                                       | 60-69           | 4 (27)       |
|                                                       | $\geq 70$       | 2 (13)       |
| <b>*Ethnicity (participant self-identified)</b>       | White           | 9 (60)       |
|                                                       | Indian          | 4 (27)       |
|                                                       | Caribbean       | 2 (13)       |
| <b>Length of time on dialysis prior to transplant</b> | No dialysis     | 1 (7)        |
|                                                       | 0 – 3 years     | 5 (33)       |
|                                                       | 4 – 9 years     | 0 (0)        |
|                                                       | $\geq 10$ years | 3 (20)       |
|                                                       | Unknown         | 6 (40)       |

\*According to the Office of National Statistics ethnicity groupings 2015

**Table 3.** Individual participant characteristics

| <b>ID</b> | <b>Age</b> | <b>Time on dialysis prior to transplant</b> |
|-----------|------------|---------------------------------------------|
| P129      | 40-49      | No dialysis                                 |
| P267      | 60-69      | Not stated                                  |

|       |       |            |
|-------|-------|------------|
| P384  | 50-59 | 16 ½ years |
| P413  | 30-39 | Not stated |
| P494  | 50-59 | 11 years   |
| P687  | 30-39 | Not stated |
| P726  | 50-59 | 10 years   |
| P781  | ≥70   | 11 months  |
| P197  | 40-49 | 1 year     |
| P225  | ≤70   | 3 years    |
| P369  | 60-69 | Not stated |
| P389  | 50-59 | 3 years    |
| P401  | 30-39 | Not stated |
| P1028 | 60-69 | 6 months   |
| P1141 | 60-69 | Not stated |

Three overarching themes were interpreted from the data. See table 4 for a summary of the themes and sub-themes:

**Table 4.** Themes and sub-themes

| Theme                                              | Sub-themes                                        |
|----------------------------------------------------|---------------------------------------------------|
| I'm living with a "foreign body" inside me         | Fear/feelings about the kidney itself             |
|                                                    | Survivors' guilt                                  |
|                                                    | Feelings of isolation                             |
|                                                    | Impacts of medication                             |
| Why am I distressed?                               | Expectations of living with a transplant          |
|                                                    | Coping with distress                              |
|                                                    | Lack of information about transplants and support |
| Different patients want different types of support |                                                   |

### **I'm living with a "foreign body" inside me**

Fear/feelings about the kidney itself

Living with a transplanted kidney and its associated treatments can evoke many different feelings and difficulties for patients. For many there is the fear and uncertainty of how long the transplant will last: participants talked about their

1  
2  
3 transplant having a finite life and how this knowledge made them worry about what  
4 would happen in the future. Three participants had experienced a failed transplant  
5 and others understood the status of their transplant could change at any time:  
6  
7  
8

9  
10 *“A lot of people I knew before when I was on dialysis who had*  
11 *transplants, they had rejections and all sorts of things. So that’s*  
12 *passing through your mind all the while”*. (P225).  
13  
14  
15  
16  
17

18  
19  
20  
21 Among some patients, their fear had escalated the longer they had been with a  
22 transplant, particularly after their transplant exceeded the average lifespan. Some  
23 patients thought the longevity of a transplanted kidney was something of a lottery,  
24 which was perceived to be outside of their control and could therefore cause  
25 distress. A few patients seemed emotionally affected by feeling they had a “foreign  
26 body” inside them (M225). One male patient talked about the possible consequences  
27 for his character of having received a female kidney. Another was anxious that his  
28 transplanted kidney might have come from someone with other health problems:  
29  
30  
31  
32  
33  
34  
35  
36  
37  
38

39  
40 *“When I got it I started to get awful thoughts at night. ‘How did this*  
41 *person die, how old were they, did they have anything else, could*  
42 *they possibly have been HIV positive? Could there have been any*  
43 *other things that were underlying that may come forward later on?’*  
44 *and I still get those sort of thoughts at the moment”*. (P1141).  
45  
46  
47  
48  
49  
50  
51  
52  
53  
54

55 Survivors’ guilt  
56  
57  
58  
59  
60

1  
2  
3 Although a transplant is the gold standard treatment for ESRD, some participants  
4 mentioned feeling guilty about being distressed and some worried this may make  
5 them appear ungrateful. They felt they should be happy because they were lucky to  
6 receive a transplant: *“but you, at the same time you’ve got no reason to feel like*  
7 *that”*. (M389). This guilt and the fear of appearing ungrateful prevented some from  
8 seeking help when they needed it and stopped them from moving forward with their  
9 lives. Some participants worried about the donor, what happened to them and the  
10 family they left behind and others had survivors’ guilt because they had received  
11 their transplant before others who had been waiting longer:  
12  
13  
14  
15  
16  
17  
18  
19  
20  
21  
22  
23

24 *“When I had my transplant I felt, I suppose what you’d call it is like*  
25 *in a sense survivors guilt.....And because I had my transplant so*  
26 *quickly I just felt this huge amount of guilt because I thought all*  
27 *those patients that I had met at [hospital] and they’ve been on the*  
28 *list for such a long time, and I thought ‘what’s the difference*  
29 *between me and them?’”*. (P413).  
30  
31  
32  
33  
34  
35  
36  
37  
38  
39  
40  
41

## 42 Feelings of isolation

43  
44  
45 There was a perception amongst several of the participants that after receiving a  
46 transplant they were no longer part of the renal unit. They talked about feeling ‘cut-  
47 off’ and ‘abandoned’ with minimal contact. One patient explained how there had  
48 been no contact with his renal unit for several years following his transplant. Patients  
49 that had transitioned from in-centre haemodialysis (HD) seemed to feel this loss  
50 acutely - they missed the supportive relationship of staff and patients in the dialysis  
51 unit:  
52  
53  
54  
55  
56  
57  
58  
59  
60

1  
2  
3       *“Once you’re transplanted, you don’t really have anything to do as*  
4       *such with the renal unit.....the only time I actually only ever was*  
5       *involved with the renal unit was when I was on dialysis. So that sort*  
6       *of like support was gone”.* (P726).  
7  
8  
9  
10  
11  
12  
13  
14  
15

16       Some patients experienced feelings of isolation because of the lack of understanding  
17       about their disease and its treatments among family, friends and society in general.

18  
19       They believed only fellow transplant patients understood their feelings:  
20  
21

22       *“It helped the fact talking to a stranger about it. You know, the wife*  
23       *couldn’t understand why I was like it and that, but obviously the*  
24       *stranger could because she knew the experience of it all”.* (P369).  
25  
26  
27  
28  
29  
30  
31  
32  
33

#### 34       Impacts of medication

35  
36       Feeling down and finding their situation difficult to deal with was widespread  
37       amongst the participants. These feelings were often present when participants were  
38       dealing with the physical side effects of the anti-rejection medications such as,  
39       weight gain, puffy appearance and excessive hair growth. Other peoples’ reactions  
40       to the physical changes were often difficult to deal with:  
41  
42  
43  
44  
45  
46  
47  
48

49       *“You know like the new face and excessive hair ..... and I found*  
50       *that I think the most difficult for me was that change and*  
51       *unfortunately when I went back to school I had a bit of , a bit of*  
52       *bullying went on, because of physically changing so much from*  
53       *what I was previously as well”.* (P687).  
54  
55  
56  
57  
58  
59  
60

1  
2  
3  
4  
5  
6 Participants explained how when they were on dialysis they felt in control of their  
7  
8 body, their treatment and their lives but following transplant many felt they no longer  
9  
10 had command of their body or life in general and yearned to take back control. Such  
11  
12 as, not wanting to leave the house because of lack of bladder control. For the  
13  
14 following patient the feeling of helplessness ended with her sabotaging her  
15  
16 treatment:  
17  
18

19  
20  
21 *“So the reason my kidney failed was because I felt like I didn’t have*  
22  
23 *much control, so I kind of stopped taking my pills, my*  
24  
25 *immunosuppressant. I stopped taking them for a while”.* (P413).  
26  
27  
28  
29  
30

### 31 **Why am I distressed?**

32  
33  
34 Expectations of living with a transplant

35  
36  
37 Following their transplant, participants did not expect to experience distress because  
38  
39 they regarded a transplant as the best treatment option for an improved quality of  
40  
41 life. Some patients had waited many years for the opportunity to receive the ‘gift’ of a  
42  
43 transplant and had been optimistic:  
44  
45

46  
47 *“I’m coming at it first time with an expectation that once you get a*  
48  
49 *transplant and you start feeling better again, life is rosy, life can get*  
50  
51 *back to normal”.* (P389).  
52  
53  
54  
55  
56

57  
58 Whilst experiencing distress, many participants did not initially relate it to their  
59  
60 transplant. The data suggest that the reasons for this were two-fold. Firstly, following

1  
2  
3 a transplant there is an expectation from family, friends, clinicians and society in  
4  
5 general that life will return to 'normal' and be 'wonderful' again.  
6  
7

8 *"I never did link it to – there was something in your paperwork that I*  
9 *had. I thought I've never associated it with the kidney operation".*  
10  
11  
12  
13 (P369).  
14  
15  
16  
17  
18

19 Secondly, renal staff did not forewarn the participants they might experience  
20  
21 distress after receiving a transplant. Some only made the connection after  
22  
23 agreeing to take part in this research study:  
24  
25  
26  
27  
28

29 *But being in the hospital and then having all sorts of side effects*  
30 *which is effecting me emotionally now. And that things could have*  
31 *been told to me before, you know, I would have prepped myself up.*  
32  
33 *Some of those things could have been addressed before. It could*  
34 *have been helpful to have been told beforehand. (P129).*  
35  
36  
37  
38  
39  
40  
41  
42  
43

#### 44 Coping with distress

45  
46

47 Renal disease and its lifecycle can make it hard for patients to be positive  
48  
49 about their transplant. Several participants explained how it was difficult to  
50  
51 cope with their emotions, to move on with their lives and how they perceived  
52  
53 family and friends, in particular, were defining them by their health condition:  
54  
55

56 *"(Sighs) Ah, again I suppose it comes back to the fact that I don't*  
57 *want to like, yes like I know I've got an illness, but I don't want to be*  
58  
59  
60



1  
2  
3 *that's who I am like. You know that's what I'm all about sort of*  
4  
5 *thing". (P726).*  
6  
7  
8  
9

10  
11 The majority of participants developed ways of accepting post-transplant life  
12 and found ways to cope with their distress. For some, distractions in the form  
13 of hobbies and pastimes such as gardening or reading helped them to adjust  
14 and for others it was important to maintain a positive outlook about their  
15 transplant:  
16  
17  
18  
19  
20  
21

22  
23 *"I've always had this positive outlook on the transplant and that."*  
24  
25 (P225).  
26  
27  
28  
29  
30  
31

### 32 Lack of information about transplants and support

33  
34 Many participants wished the renal team had explained to them the possibility  
35 of experiencing post-transplant distress and lamented the lack of information  
36 about this and the lack of available support. Many felt that "forewarned is  
37 forearmed" and were upset they missed the opportunity to plan, in advance,  
38 coping strategies. This lack of information provision was associated with a lack  
39 of continuity of care, and participants felt that staff regarded transplant patients  
40 as a lower priority compared to those on dialysis:  
41  
42  
43  
44  
45  
46  
47  
48  
49

50  
51 *"Time is precious, resources are scarce, I suspect that probably it*  
52 *never feels as though it's a big priority". (P389).*  
53  
54  
55  
56  
57  
58  
59

### 60 **Different patients want different types of support**

1  
2  
3 There were, however, diverse views amongst the participants about the types of  
4 support they would like to receive, and who should deliver it. For example, one  
5  
6 participant described how she thought talking to other patients might have provided  
7  
8 the support she sought.  
9  
10

11  
12  
13 *“So with other patients in your situation, so that you could liaise with*  
14 *each other to see what new life is all about”.* (P494).  
15  
16

17  
18  
19  
20  
21 There were mixed views about the role of healthcare professionals (HCPs), with  
22 some suggesting that HCPs should be more proactive in identifying distress in renal  
23 transplant patients and directing them to appropriate sources of help and support.  
24  
25 Whereas others did not see this as the role of the renal team – they are there to  
26 provide medical assistance and advice not psychological and emotional support.  
27  
28 Many suggested that specialist psychological services should be available as in  
29 integral part of care for renal transplant patients:  
30  
31  
32  
33  
34  
35  
36

37  
38 *“I think you need psychologists as part of the renal team, a*  
39 *psychologist with renal expertise”.* (P781).  
40  
41  
42  
43  
44  
45

46 However, because of the sensitive and personal nature of distress or for fear  
47 of showing weakness there were those who were reluctant to talk about their  
48 distress to anyone, making it difficult for HCPs to assess the support needs of  
49 these patients:  
50  
51  
52  
53  
54  
55  
56  
57  
58  
59  
60

1  
2  
3                   *“You know, it might have been something to do with medication –*  
4  
5                   *I’m just guessing. But I should have told them but as I say, I mean*  
6  
7                   *it’s not the sort of thing I tell people” (P369).*  
8  
9

## 13                   **DISCUSSION**

16                   This research has highlighted the complex relationship that renal transplant patients  
17                   have with their new kidney, their largely unanticipated experience of their distress  
18                   and the diverse opinions on the types of support they would like to help them through  
19                   their distress. Current research has shown that the prevalence of distress in renal  
20                   transplant patients is 25% and although this is lower than the 33% of dialysis  
21                   patients, it is still substantial and shows that many transplant patients experience  
22                   ongoing issues.<sup>5</sup> There is a range of reasons why despite all expectations of living  
23                   an improved life, some patients became uneasy with their transplanted kidney and  
24                   why some did not associate their distress with their transplant and/or  
25                   immunosuppressant medication.  
26  
27  
28  
29  
30  
31  
32  
33  
34  
35  
36  
37  
38  
39  
40  
41  
42

43                   Patients found it difficult to accept their new kidney because of a number of different  
44                   situations including: the side effects of medication, fear of transplant rejection and  
45                   feeling obliged to make the most of life because of the “gift” of a transplant.<sup>24-27</sup> It  
46                   has been reported that concern about potential lifespan of the transplanted kidney  
47                   may be the biggest stressor immediately after transplant, this fear subsides with  
48                   time.<sup>8</sup> However, our findings do not reflect this: the majority of our participants,  
49                   regardless of time since transplant, reported some level of emotional distress.<sup>5</sup>  
50                   Emotional problems such as depression, anxiety, stress, and concerns about body  
51  
52  
53  
54  
55  
56  
57  
58  
59  
60

1  
2  
3 image are known indicators of poor medication adherence.<sup>3 6</sup> and as discussed, may  
4 result in patients wishing they were back on dialysis and in some cases sabotaging  
5 their treatment. Gill,<sup>8</sup> Suzuki <sup>28</sup> and Fox <sup>29</sup> found that those receiving a kidney from a  
6 living donor had a vested interest in each other's well-being and were motivated to  
7 comply with their medication regimes and enjoyed an improved quality of life. For  
8 those receiving a cadaver kidney, thoughts about who their kidney came from were  
9 forefront in their mind and for some this had a negative effect on their relationship  
10 with their kidney – making them feel as though they had a “foreign body” inside  
11 them. The emotional distress patients feel may be down to unrealistically high  
12 expectations of life post-transplant and there is a need for these expectations to be  
13 managed by renal services.<sup>8 25 30</sup>

14  
15  
16  
17  
18  
19  
20  
21  
22  
23  
24  
25  
26  
27  
28  
29  
30  
31  
32 The majority of participants did not expect to experience distress after a transplant.  
33 This may be that patients naively perceive that by having a transplant their quality of  
34 life will improve quickly and they will return to a normal life.<sup>31</sup> Consequently, patients  
35 are often ill-prepared and feel helpless when trying to cope with their distress.<sup>32</sup>  
36  
37 Evidence has shown that improving coping skills,<sup>33</sup> education before and after  
38 transplantation,<sup>34</sup> and active information seeking by patients can have a beneficial  
39 effect on patients' medical and psychological problems.<sup>8 25 35</sup> The National Institute  
40 for Health and Care Excellence (NICE) advocate keeping patients informed at all  
41 stages of treatment and encourage the promotion of self-care and self-management  
42 skills.<sup>36</sup> However, HCPs can find it difficult to recognise distress or anxiety in patients  
43 and are unsure at which point in the disease trajectory to discuss this with their  
44 patients.<sup>37</sup> When a patient is informed, it empowers them to take control of their  
45 condition and having control can itself lower the chances of distress.<sup>6</sup> It is therefore  
46  
47  
48  
49  
50  
51  
52  
53  
54  
55  
56  
57  
58  
59  
60

1  
2  
3 important that HCPs provide and share information and discuss all possible  
4  
5 outcomes and coping strategies at the appropriate time in the treatment pathway.<sup>3 30</sup>  
6

7  
8 32  
9

10  
11  
12  
13 Not all renal transplant patients will experience distress and not all of those who do  
14  
15 will want to receive support. This research has shown that some patients do not wish  
16  
17 to talk about their feelings for fear of appearing ungrateful or weak, making it difficult  
18  
19 for HCPs to understand, assess and procure appropriate support.<sup>37</sup> Even when  
20  
21 patients do want to talk about their feelings, there is “no one size fits all” solution to  
22  
23 the provision of support.<sup>38</sup> Different patients have different emotional needs  
24  
25 indicating that any support offered to patients should be individualised in order to  
26  
27 meet this variance of need.<sup>39</sup>  
28  
29  
30  
31  
32  
33  
34  
35

36 There were no discernible differences in the depth of data and the length of interview  
37  
38 between those conducted face-to-face and those conducted over the telephone. A  
39  
40 limitation of this study is that the interview data analysed for this research is a sub-  
41  
42 set of a larger set of data. Although the 15 in-depth interviews provided sufficient  
43  
44 data to answer the research questions and were more representative of the wider  
45  
46 group of transplant patients, it is important for future research to explore these areas  
47  
48 with a more diverse and carefully stratified sample.  
49  
50  
51  
52  
53  
54

## 55 **CONCLUSIONS**

56  
57  
58  
59  
60

1  
2  
3 Our research has highlighted a number of points: firstly, it is important to talk to  
4 patients and their families pre-transplant about the possibility of experiencing mild-to-  
5 moderate post-transplant distress. Secondly, patients should be encouraged to think  
6 about potential coping strategies and finally, transplant patients with mild-to-  
7 moderate distress should be able to choose from a variety of support options: peer  
8 support; HCPs with augmented skills in detecting and managing distress; access to  
9 psychology services.  
10  
11  
12  
13  
14  
15  
16  
17  
18  
19  
20  
21  
22

23 **Acknowledgements:** Francesca Taylor and Elaine Kidney conducted the  
24 interviews. Pamela Nayyar provided administrative support for this research. The  
25 patient and public involvement group of the CLAHRC West Midlands long-term  
26 conditions theme and a renal patient advisory group for their invaluable help and  
27 advice. Finally, a huge thank you goes out to all of the participants who gave up their  
28 time to talk to us.  
29  
30  
31  
32  
33  
34  
35  
36  
37  
38  
39  
40

41 **Author Contributors:** JJ: Conceptualisation (for this sub-study), formal analysis,  
42 interpretation of data, methodology, validation, writing (original draft); GC: formal  
43 analysis, validation, writing (critical review and editing); SD, & KA: interpretation of  
44 data, writing (critical review and editing), JN & JB: Conceptualisation, validation,  
45 writing (critical review and editing). All authors have approved the final version.  
46  
47  
48  
49  
50  
51  
52  
53  
54

55 **Funding:** This research was funded by the National Institute for Health Research  
56 Collaboration for Leadership in Applied Health Research and Care West Midlands  
57 (NIHR CLAHRC WM), now recommissioned as NIHR Applied Research  
58  
59  
60

1  
2  
3 Collaboration West Midlands. The views expressed in this publication are those of  
4 the author(s) and not necessarily those of the NIHR or the Department of Health and  
5  
6  
7  
8 Social Care.  
9

10  
11  
12  
13  
14 **Competing interests:** -None  
15

16  
17  
18  
19 **Ethical approval:** The Coventry and Warwickshire Research Ethics Committee  
20 granted approval for this and the wider study in October 2015 [Ref 15/WM/0288].  
21  
22 The Research Governance office at each of the participating hospital trusts also  
23  
24  
25  
26  
27 gave approval for the study.  
28

29  
30  
31  
32 **Data availability:** The research data is confidential. Participants did not give consent  
33  
34  
35  
36  
37  
38  
39  
40  
41  
42  
43  
44  
45  
46  
47  
48  
49  
50  
51  
52  
53  
54  
55  
56  
57  
58  
59  
60  
61  
62  
63  
64  
65  
66  
67  
68  
69  
70  
71  
72  
73  
74  
75  
76  
77  
78  
79  
80  
81  
82  
83  
84  
85  
86  
87  
88  
89  
90  
91  
92  
93  
94  
95  
96  
97  
98  
99  
100  
101  
102  
103  
104  
105  
106  
107  
108  
109  
110  
111  
112  
113  
114  
115  
116  
117  
118  
119  
120  
121  
122  
123  
124  
125  
126  
127  
128  
129  
130  
131  
132  
133  
134  
135  
136  
137  
138  
139  
140  
141  
142  
143  
144  
145  
146  
147  
148  
149  
150  
151  
152  
153  
154  
155  
156  
157  
158  
159  
160  
161  
162  
163  
164  
165  
166  
167  
168  
169  
170  
171  
172  
173  
174  
175  
176  
177  
178  
179  
180  
181  
182  
183  
184  
185  
186  
187  
188  
189  
190  
191  
192  
193  
194  
195  
196  
197  
198  
199  
200  
201  
202  
203  
204  
205  
206  
207  
208  
209  
210  
211  
212  
213  
214  
215  
216  
217  
218  
219  
220  
221  
222  
223  
224  
225  
226  
227  
228  
229  
230  
231  
232  
233  
234  
235  
236  
237  
238  
239  
240  
241  
242  
243  
244  
245  
246  
247  
248  
249  
250  
251  
252  
253  
254  
255  
256  
257  
258  
259  
260  
261  
262  
263  
264  
265  
266  
267  
268  
269  
270  
271  
272  
273  
274  
275  
276  
277  
278  
279  
280  
281  
282  
283  
284  
285  
286  
287  
288  
289  
290  
291  
292  
293  
294  
295  
296  
297  
298  
299  
300  
301  
302  
303  
304  
305  
306  
307  
308  
309  
310  
311  
312  
313  
314  
315  
316  
317  
318  
319  
320  
321  
322  
323  
324  
325  
326  
327  
328  
329  
330  
331  
332  
333  
334  
335  
336  
337  
338  
339  
340  
341  
342  
343  
344  
345  
346  
347  
348  
349  
350  
351  
352  
353  
354  
355  
356  
357  
358  
359  
360  
361  
362  
363  
364  
365  
366  
367  
368  
369  
370  
371  
372  
373  
374  
375  
376  
377  
378  
379  
380  
381  
382  
383  
384  
385  
386  
387  
388  
389  
390  
391  
392  
393  
394  
395  
396  
397  
398  
399  
400  
401  
402  
403  
404  
405  
406  
407  
408  
409  
410  
411  
412  
413  
414  
415  
416  
417  
418  
419  
420  
421  
422  
423  
424  
425  
426  
427  
428  
429  
430  
431  
432  
433  
434  
435  
436  
437  
438  
439  
440  
441  
442  
443  
444  
445  
446  
447  
448  
449  
450  
451  
452  
453  
454  
455  
456  
457  
458  
459  
460  
461  
462  
463  
464  
465  
466  
467  
468  
469  
470  
471  
472  
473  
474  
475  
476  
477  
478  
479  
480  
481  
482  
483  
484  
485  
486  
487  
488  
489  
490  
491  
492  
493  
494  
495  
496  
497  
498  
499  
500  
501  
502  
503  
504  
505  
506  
507  
508  
509  
510  
511  
512  
513  
514  
515  
516  
517  
518  
519  
520  
521  
522  
523  
524  
525  
526  
527  
528  
529  
530  
531  
532  
533  
534  
535  
536  
537  
538  
539  
540  
541  
542  
543  
544  
545  
546  
547  
548  
549  
550  
551  
552  
553  
554  
555  
556  
557  
558  
559  
560  
561  
562  
563  
564  
565  
566  
567  
568  
569  
570  
571  
572  
573  
574  
575  
576  
577  
578  
579  
580  
581  
582  
583  
584  
585  
586  
587  
588  
589  
590  
591  
592  
593  
594  
595  
596  
597  
598  
599  
600  
601  
602  
603  
604  
605  
606  
607  
608  
609  
610  
611  
612  
613  
614  
615  
616  
617  
618  
619  
620  
621  
622  
623  
624  
625  
626  
627  
628  
629  
630  
631  
632  
633  
634  
635  
636  
637  
638  
639  
640  
641  
642  
643  
644  
645  
646  
647  
648  
649  
650  
651  
652  
653  
654  
655  
656  
657  
658  
659  
660  
661  
662  
663  
664  
665  
666  
667  
668  
669  
670  
671  
672  
673  
674  
675  
676  
677  
678  
679  
680  
681  
682  
683  
684  
685  
686  
687  
688  
689  
690  
691  
692  
693  
694  
695  
696  
697  
698  
699  
700  
701  
702  
703  
704  
705  
706  
707  
708  
709  
710  
711  
712  
713  
714  
715  
716  
717  
718  
719  
720  
721  
722  
723  
724  
725  
726  
727  
728  
729  
730  
731  
732  
733  
734  
735  
736  
737  
738  
739  
740  
741  
742  
743  
744  
745  
746  
747  
748  
749  
750  
751  
752  
753  
754  
755  
756  
757  
758  
759  
760  
761  
762  
763  
764  
765  
766  
767  
768  
769  
770  
771  
772  
773  
774  
775  
776  
777  
778  
779  
780  
781  
782  
783  
784  
785  
786  
787  
788  
789  
790  
791  
792  
793  
794  
795  
796  
797  
798  
799  
800  
801  
802  
803  
804  
805  
806  
807  
808  
809  
810  
811  
812  
813  
814  
815  
816  
817  
818  
819  
820  
821  
822  
823  
824  
825  
826  
827  
828  
829  
830  
831  
832  
833  
834  
835  
836  
837  
838  
839  
840  
841  
842  
843  
844  
845  
846  
847  
848  
849  
850  
851  
852  
853  
854  
855  
856  
857  
858  
859  
860  
861  
862  
863  
864  
865  
866  
867  
868  
869  
870  
871  
872  
873  
874  
875  
876  
877  
878  
879  
880  
881  
882  
883  
884  
885  
886  
887  
888  
889  
890  
891  
892  
893  
894  
895  
896  
897  
898  
899  
900  
901  
902  
903  
904  
905  
906  
907  
908  
909  
910  
911  
912  
913  
914  
915  
916  
917  
918  
919  
920  
921  
922  
923  
924  
925  
926  
927  
928  
929  
930  
931  
932  
933  
934  
935  
936  
937  
938  
939  
940  
941  
942  
943  
944  
945  
946  
947  
948  
949  
950  
951  
952  
953  
954  
955  
956  
957  
958  
959  
960  
961  
962  
963  
964  
965  
966  
967  
968  
969  
970  
971  
972  
973  
974  
975  
976  
977  
978  
979  
980  
981  
982  
983  
984  
985  
986  
987  
988  
989  
990  
991  
992  
993  
994  
995  
996  
997  
998  
999  
1000

## REFERENCES

1. UK Renal Registry 21st Annual Report - data to 31/12/2017. Bristol, UK, 2019.
2. Soni RK. Health-related quality of life outcomes in chronic kidney disease. *Curr Opin Nephrol Hypertens*;19(2):153-60. doi: <https://doi.org/10.1097/MNH.0b013e328335f939>
3. Schell JO, Patel UD, Steinhauser KE, et al. Discussions of the kidney disease trajectory by elderly patients and nephrologists: a qualitative study. *American journal of kidney diseases : the official journal of the National Kidney Foundation* 2012;59(4):495-503. doi: <https://doi.org/10.1053/j.ajkd.2011.11.023> [published Online First: 01/04]
4. Murtagh FEM, Addington-Hall J, Higginson IJ. The Prevalence of Symptoms in End-Stage Renal Disease: A Systematic Review. *Advances in Chronic Kidney Disease* 2007;14(1):82-99. doi: <https://doi.org/10.1053/j.ackd.2006.10.001>
5. Damery S, Brown C, Sein K, et al. The prevalence of mild-to-moderate distress in patients with end-stage renal disease: results from a patient survey using the emotion thermometers in four

- 1  
2  
3 hospital Trusts in the West Midlands, UK. *BMJ open* 2019;9(5):e027982. doi:  
4 <https://doi.org/10.1136/bmjopen-2018-027982>
- 5  
6 6. Cukor D, Rosenthal DS, Jindal RM, et al. Depression is an important contributor to low medication  
7 adherence in hemodialyzed patients and transplant recipients. *Kidney Int* 2009;75(11):1223-29. doi:  
8 <https://doi.org/10.1038/ki.2009.51>
- 9  
10 7. Combes G, Allen K, Sein K. Evaluation of case study sites for home therapies for people with  
11 chronic kidney disease Birmingham: University of Birmingham: West Midlands Central Health  
12 Innovation and Education Cluster; 2013 [Available from:  
13 <http://www.birmingham.ac.uk/research/activity/mds/projects/WMC-HIEC/publications.aspx>  
14 accessed May 19.
- 15  
16 8. Gill P. Stressors and coping mechanisms in live-related renal transplantation. *J Clin Nurs*  
17 2012;21(11-12):1622-31. doi: <https://doi.org/10.1111/j.1365-2702.2012.04085.x>
- 18  
19 9. Kohlsdorf M. Coping Strategies Adopted by Patients With Chronic Kidney Disease in Preparation  
20 for Transplant. *Psychol Comm health* 2015;4(1):27-38. doi: <https://doi.org/10.5964/pch.v4i1.103>  
21 [published Online First: 2015-03-31]
- 22  
23 10. Cukor D, Newville H, Jindal R. Depression and immunosuppressive medication adherence in  
24 kidney transplant patients. *General hospital psychiatry* 2008;30(4):386-7. doi:  
25 <https://doi.org/10.1016/j.genhosppsy.2007.12.003> [published Online First: 2008/07/01]
- 26  
27 11. Department of Health, The National Service Framework for Renal Services Part 2: Chronic kidney  
28 disease, acute renal failure and end of life care. London: Department of Health 2005.
- 29  
30 12. Department of Health, Closing the gap: priorities for essential change in mental health. London:  
31 Department of Health 2014
- 32  
33 13. Spencer BW, Chilcot J, Farrington K. Still sad after successful renal transplantation: are we failing  
34 to recognise depression? An audit of depression screening in renal graft recipients. *Nephron Clinical*  
35 *practice* 2011;117(2):c106-12. doi: <https://doi.org/10.1159/000319657> [published Online First:  
36 2010/08/10]
- 37  
38 14. Almgren M. The meaning of being in uncertainty after heart transplantation - an unrevealed  
39 source to distress. *European Journal of Cardiovascular Nursing* 2017;16(2):167-75. doi:  
40 10.1177/1474515116648240
- 41  
42 15. Mauthner OE. Heart transplants: Identity disruption, bodily integrity and interconnectedness.  
43 *Health: An Interdisciplinary Journal for the Social Study of Health, Illness & Medicine* 2014;19(6):578-  
44 95. doi: 10.1177/1363459314560067
- 45  
46 16. Taylor F, Taylor C, Baharani J, et al. Integrating emotional and psychological support into the end-  
47 stage renal disease pathway: a protocol for mixed methods research to identify patients' lower-level  
48 support needs and how these can most effectively be addressed. *BMC Nephrol* 2016;17(1):111. doi:  
49 <https://doi.org/10.1186/s12882-016-0327-2> [published Online First: 2016/08/04]
- 50  
51 17. Mitchell AJ, Baker-Glenn EA, Granger L, et al. Can the Distress Thermometer be improved by  
52 additional mood domains? Part I. Initial validation of the Emotion Thermometers tool. *Psycho-*  
53 *Oncology* 2010;19(2):125-33. doi: <https://doi.org/10.1002/pon.1523>
- 54  
55 18. K C, L B. Qualitative interviewing and grounded theory analysis. In: Gubrium JF, Holstein AB,  
56 McKinney KD, eds. The SAGE Handbook of interview research: The Complexity of the Craft.  
57 California, USA: Sage publications 2012.
- 58  
59 19. Braun V, Clarke V. Successful Qualitative Research: a practical guide for beginners. Thousand  
60 Oaks, CA: Sage 2013:174-179.
20. Caelli K, Ray L, Mill J. 'Clear as Mud': Toward greater clarity in generic qualitative research. *Int J Qual Methods* 2003;2(2):1-24.
21. Cooper S, Endacott R. Generic qualitative research: a design for qualitative research in emergency care? *Emergency Medicine Journal : EMJ* 2007;24(12):816-19. doi: 10.1136/emj.2007.050641
22. Alley S, Jackson SF, Shakya YB. Reflexivity: A Methodological Tool in the Knowledge Translation Process? *Health Promotion Practice* 2015;16(3):426-31. doi: 10.1177/1524839914568344



23. Berger R. Now I see it, now I don't: researcher's position and reflexivity in qualitative research. *Qualitative Research* 2015;15(2):219-34. doi: 10.1177/1468794112468475
24. Achille MA, Ouellette A, Fournier S, et al. Impact of Transplant-Related Stressors and Feelings of Indebtedness on Psychosocial Adjustment Following Kidney Transplantation. *Journal of Clinical Psychology in Medical Settings* 2004;11(1):63-73. doi: 10.1023/B:JOCS.0000016271.10786.ee
25. Chilcot J, Spencer BWJ, Maple H, et al. Depression and Kidney Transplantation. *Transplantation* 2014;97(7):717-21. doi: <https://doi.org/10.1097/01.TP.0000438212.72960.ae>
26. Shemesh Y, Peles-Bortz A, Peled Y, et al. Feelings of indebtedness and guilt toward donor and immunosuppressive medication adherence among heart transplant (HTx) patients, as assessed in a cross-sectional study with the Basel Assessment of Adherence to Immunosuppressive Medications Scale (BAASIS). *Clinical Transplantation* 2017;31(10):e13053. doi: 10.1111/ctr.13053
27. Poole J, Ward J, Deluca E, et al. Grief and loss for patients before and after heart transplant. *Heart & lung : the journal of critical care* 2016;45(3):193. doi: 10.1016/j.hrtlng.2016.01.006
28. Suzuki A, Kenmochi T, Maruyama M, et al. Changes in quality of life in deceased versus living-donor kidney transplantations. *Transplant Proc* 2012;44(1):287-9. doi: <https://doi.org/10.1016/j.transproceed.2011.11.056> [published Online First: 2012/02/09]
29. Fox RC. Through the lenses of biology and sociology: Organ replacement. In: Williams SJ, Birke L, Bendelow GA, eds. *Debating Biology: Sociological reflection on health, medicine and society*. London: Routledge 2003.
30. Pinter J, Hanson CS, Craig JC, et al. 'I feel stronger and younger all the time'—perspectives of elderly kidney transplant recipients: thematic synthesis of qualitative research. *Nephrol Dial Transplant* 2016;31(9):1531-40. doi: <https://doi.org/10.1093/ndt/gfv463>
31. Boaz A, Morgan M. Working to establish 'normality' post-transplant: a qualitative study of kidney transplant patients. *Chronic illness* 2014;10(4):247-58. doi: <https://doi.org/10.1177/1742395313504789> [published Online First: 2013/09/28]
32. Cormier NR, Gallo-Cruz SR, Beard RL. Navigating the new, transplanted self: how recipients manage the cognitive risks of organ transplantation. *Sociology of health & illness* 2017;39(8):1496-513. doi: <https://doi.org/10.1111/1467-9566.12610> [published Online First: 2017/10/11]
33. Been-Dahmen JMJ, Beck DK, Peeters MAC, et al. Evaluating the feasibility of a nurse-led self-management support intervention for kidney transplant recipients: a pilot study. *BMC nephrology* 2019;20(1):143. doi: <https://doi.org/10.1186/s12882-019-1300-7> [published Online First: 2019/04/29]
34. Curcani M, Tan M. the factors affecting the quality of life of patients who have undergone kidney transplants *Pakistan Journal of Medicine* 2012;27(5):1092-97.
35. Muehrer RJ, Becker BN. Life after transplantation: new transitions in quality of life and psychological distress. *Semin Dial* 2005;18(2):124-31. doi: <https://doi.org/10.1111/j.1525-139X.2005.18214.x> [published Online First: 2005/03/18]
36. National Institute for Health and Clinical Excellence, CG138 Patient experience in NHS services: improving the experience of care for people using adult NHS services Manchester: National Institute for Health and Clinical Excellence 2012 [Available from: <http://guidance.nice.org.uk/cg138> accessed July 2019.
37. Damery S, Sein K, Combes G. The prevalence, experience and management of mild to moderate distress in patients with end stage renal disease: results from a multi-centre, mixed methods research study: NIHR CLAHRC-WM, University of Birmingham, 2019.
38. Been-Dahmen JMJ, Grijpma JW, Ista E, et al. Self-management challenges and support needs among kidney transplant recipients: A qualitative study. *Journal of advanced nursing* 2018;74(10):2393-405. doi: <https://doi.org/10.1111/jan.13730> [published Online First: 2018/06/06]
39. Grijpma JW, Tielen M, van Staa AL, et al. Kidney transplant patients' attitudes towards self-management support: A Q-methodological study. *Patient Educ Couns* 2016;99(5):836-43. doi: <https://doi.org/10.1016/j.pec.2015.11.018> [published Online First: 2015/12/20]

## COREQ (COnsolidated criteria for REporting Qualitative research) Checklist

A checklist of items that should be included in reports of qualitative research. You must report the page number in your manuscript where you consider each of the items listed in this checklist. If you have not included this information, either revise your manuscript accordingly before submitting or note N/A.

| Topic                                          | Item No. | Guide Questions/Description                                                                                                                              | Reported on Page No. |
|------------------------------------------------|----------|----------------------------------------------------------------------------------------------------------------------------------------------------------|----------------------|
| <b>Domain 1: Research team and reflexivity</b> |          |                                                                                                                                                          |                      |
| <i>Personal characteristics</i>                |          |                                                                                                                                                          |                      |
| Interviewer/facilitator                        | 1        | Which author/s conducted the interview or focus group?                                                                                                   |                      |
| Credentials                                    | 2        | What were the researcher's credentials? E.g. PhD, MD                                                                                                     |                      |
| Occupation                                     | 3        | What was their occupation at the time of the study?                                                                                                      |                      |
| Gender                                         | 4        | Was the researcher male or female?                                                                                                                       |                      |
| Experience and training                        | 5        | What experience or training did the researcher have?                                                                                                     |                      |
| <i>Relationship with participants</i>          |          |                                                                                                                                                          |                      |
| Relationship established                       | 6        | Was a relationship established prior to study commencement?                                                                                              |                      |
| Participant knowledge of the interviewer       | 7        | What did the participants know about the researcher? e.g. personal goals, reasons for doing the research                                                 |                      |
| Interviewer characteristics                    | 8        | What characteristics were reported about the interviewer/facilitator? e.g. Bias, assumptions, reasons and interests in the research topic                |                      |
| <b>Domain 2: Study design</b>                  |          |                                                                                                                                                          |                      |
| <i>Theoretical framework</i>                   |          |                                                                                                                                                          |                      |
| Methodological orientation and Theory          | 9        | What methodological orientation was stated to underpin the study? e.g. grounded theory, discourse analysis, ethnography, phenomenology, content analysis |                      |
| <i>Participant selection</i>                   |          |                                                                                                                                                          |                      |
| Sampling                                       | 10       | How were participants selected? e.g. purposive, convenience, consecutive, snowball                                                                       |                      |
| Method of approach                             | 11       | How were participants approached? e.g. face-to-face, telephone, mail, email                                                                              |                      |
| Sample size                                    | 12       | How many participants were in the study?                                                                                                                 |                      |
| Non-participation                              | 13       | How many people refused to participate or dropped out? Reasons?                                                                                          |                      |
| <i>Setting</i>                                 |          |                                                                                                                                                          |                      |
| Setting of data collection                     | 14       | Where was the data collected? e.g. home, clinic, workplace                                                                                               |                      |
| Presence of non-participants                   | 15       | Was anyone else present besides the participants and researchers?                                                                                        |                      |
| Description of sample                          | 16       | What are the important characteristics of the sample? e.g. demographic data, date                                                                        |                      |
| <i>Data collection</i>                         |          |                                                                                                                                                          |                      |
| Interview guide                                | 17       | Were questions, prompts, guides provided by the authors? Was it pilot tested?                                                                            |                      |
| Repeat interviews                              | 18       | Were repeat interviews carried out? If yes, how many?                                                                                                    |                      |
| Audio/visual recording                         | 19       | Did the research use audio or visual recording to collect the data?                                                                                      |                      |
| Field notes                                    | 20       | Were field notes made during and/or after the interview or focus group?                                                                                  |                      |
| Duration                                       | 21       | What was the duration of the interviews or focus group?                                                                                                  |                      |
| Data saturation                                | 22       | Was data saturation discussed?                                                                                                                           |                      |
| Transcripts returned                           | 23       | Were transcripts returned to participants for comment and/or                                                                                             |                      |

| Topic                                  | Item No. | Guide Questions/Description                                                                                                        | Reported on Page No. |
|----------------------------------------|----------|------------------------------------------------------------------------------------------------------------------------------------|----------------------|
|                                        |          | correction?                                                                                                                        |                      |
| <b>Domain 3: analysis and findings</b> |          |                                                                                                                                    |                      |
| <i>Data analysis</i>                   |          |                                                                                                                                    |                      |
| Number of data coders                  | 24       | How many data coders coded the data?                                                                                               |                      |
| Description of the coding tree         | 25       | Did authors provide a description of the coding tree?                                                                              |                      |
| Derivation of themes                   | 26       | Were themes identified in advance or derived from the data?                                                                        |                      |
| Software                               | 27       | What software, if applicable, was used to manage the data?                                                                         |                      |
| Participant checking                   | 28       | Did participants provide feedback on the findings?                                                                                 |                      |
| <i>Reporting</i>                       |          |                                                                                                                                    |                      |
| Quotations presented                   | 29       | Were participant quotations presented to illustrate the themes/findings?<br>Was each quotation identified? e.g. participant number |                      |
| Data and findings consistent           | 30       | Was there consistency between the data presented and the findings?                                                                 |                      |
| Clarity of major themes                | 31       | Were major themes clearly presented in the findings?                                                                               |                      |
| Clarity of minor themes                | 32       | Is there a description of diverse cases or discussion of minor themes?                                                             |                      |

Developed from: Tong A, Sainsbury P, Craig J. Consolidated criteria for reporting qualitative research (COREQ): a 32-item checklist for interviews and focus groups. *International Journal for Quality in Health Care*. 2007. Volume 19, Number 6: pp. 349 – 357

**Once you have completed this checklist, please save a copy and upload it as part of your submission. DO NOT include this checklist as part of the main manuscript document. It must be uploaded as a separate file.**
